# Supplementary material for: Metagenomics Analysis to Investigate the Microbial Communities and Their Functional Profile During Cyanobacterial Blooms in Lake Varese
Source: PubMed Central journal article supplement (PMC9016052; doi:10.1007/s00248-021-01914-5), 2021-11-12
Supplement: 248_2021_1914_MOESM1_ESM.pdf [file 248_2021_1914_MOESM1_ESM.pdf]

# *Microbial Ecology*

## *Supplementary Information*

### **Metagenomics analysis to investigate the microbial communities and their functional profile during Cyanobacterial Blooms in Lake Varese**

**Isabella Sanseverino<sup>1</sup>, Patrizia Pretto<sup>2</sup>, Diana Conduto António<sup>1</sup>, Armin Lahm<sup>3</sup>, Chiara Facca<sup>4</sup>, Robert Loos<sup>1</sup>, Helle Skejo<sup>1</sup>, Andrea Beghi<sup>5</sup>, Franca Pandolfi<sup>5</sup>, Pietro Genoni<sup>5</sup>, and Teresa Lettieri<sup>1\*</sup>**

<sup>1</sup>European Commission, Joint Research Centre (JRC), Via E. Fermi 2749, 21027 Ispra (VA), Italy

<sup>2</sup>Biosearch Ambiente srl, Via Tetti Gai 59, 10091, Alpignano (TO), Italy

<sup>3</sup>Bioinformatics project support, P.za S.M. Liberatrice 18, 00153 Roma, Italy

<sup>4</sup>Department of Environmental Science, Informatics and Statistics, University Ca' Foscari Venezia, Via Torino 155, 301702 Mestre (VE), Italy

<sup>5</sup>ARPA, Agenzia Regionale per la Protezione dell'Ambiente della Lombardia, Via Ippolito Rosellini 17, 20124, Milano, Italy

**\* Correspondence:**

Teresa Lettieri

[teresa.lettieri@ec.europa.eu](mailto:teresa.lettieri@ec.europa.eu)

**Supplementary Figures and Tables****Table S1.** Overview of shotgun data processing. Number of shotgun data read pairs that passed the trimmomatic QC filtering step. Epi 0.5 m - E; 2.5x Secchi - S and Meso 13 m – M.

| Dataset      | Total # read pairs | After QC filtering |
|--------------|--------------------|--------------------|
| 31/8/2016 E  | 9116300            | 5831783            |
| 31/8/2016 M  | 8539736            | 6744986            |
| 7/9/2016 E   | 8642971            | 6755860            |
| 7/9/2016 S   | 8115974            | 6418729            |
| 14/9/2016 E  | 8073606            | 6434912            |
| 14/9/2016 S  | 8354250            | 6606222            |
| 21/9/2016 E  | 10100795           | 7902173            |
| 21/9/2016 S  | 10010228           | 7962451            |
| 19/7/2017 E  | 13481272           | 11645493           |
| 19/7/2017 M  | 12130593           | 10550605           |
| 19/7/2017 S  | 10644704           | 9052179            |
| 26/7/2017 E  | 10962868           | 9257637            |
| 2/8/2017 E   | 14712626           | 12869176           |
| 2/8/2017 M   | 13299405           | 11306753           |
| 9/8/2017 E   | 11466233           | 9573140            |
| 9/8/2017 M   | 13092881           | 11347673           |
| 23/8/2017 E  | 10728850           | 9333322            |
| 23/8/2017 S  | 10588789           | 8997837            |
| 30/8/2017 E  | 12667744           | 10983341           |
| 30/8/2017 S  | 11402052           | 9777820            |
| 27/9/2017 E  | 13143807           | 11505318           |
| 27/9/2017 S  | 14233363           | 12319660           |
| 04/10/2017 E | 11120130           | 9365988            |
| 04/10/2017 S | 16960932           | 14427991           |

**Table S2.** Overview of 16S V3-V4 data processing. Number of V3-V4 amplicon sequences (merged read pairs) are reported together with minimum, average, median and maximum length of sequences. The number sequences shorter than 350 nucleotides is also reported. Epi 0.5 m - E; 2.5x Secchi - S and Meso 13 m – M.

| Dataset     | Min | Average | Median | Max | Number of amplicons | below 350 |
|-------------|-----|---------|--------|-----|---------------------|-----------|
| 14/9/2016 E | 383 | 410.0   | 405    | 440 | 31709               | 6         |
| 14/9/2016 M | 367 | 418.8   | 426    | 465 | 47444               | 24        |
| 14/9/2016 S | 351 | 414.3   | 407    | 464 | 57488               | 16        |
| 21/9/2016 E | 373 | 410.6   | 405    | 464 | 26185               | 6         |
| 21/9/2016 M | 366 | 417.5   | 422    | 443 | 41994               | 18        |
| 21/9/2016 S | 371 | 411.8   | 407    | 463 | 36515               | 12        |
| 28/9/2016 E | 360 | 411.3   | 407    | 457 | 58522               | 14        |
| 28/9/2016 M | 353 | 416.8   | 422    | 463 | 32481               | 15        |
| 28/9/2016 S | 371 | 413.7   | 407    | 442 | 22256               | 8         |
| 31/8/2016 E | 372 | 410.4   | 407    | 441 | 43676               | 24        |
| 31/8/2016 M | 373 | 420.0   | 426    | 465 | 24584               | 8         |
| 5/10/2016 E | 358 | 412.4   | 407    | 465 | 43197               | 25        |
| 5/10/2016 M | 353 | 417.5   | 422    | 463 | 30257               | 12        |
| 7/9/2016 E  | 373 | 411.1   | 407    | 464 | 34290               | 12        |
| 7/9/2016 M  | 353 | 419.5   | 426    | 465 | 29238               | 5         |
| 7/9/2016 S  | 368 | 412.2   | 405    | 465 | 70221               | 15        |
| 19/7/2017 E | 351 | 411.5   | 407    | 450 | 60514               | 68        |
| 19/7/2017 S | 355 | 411.5   | 407    | 451 | 60013               | 72        |
| 26/7/2017 E | 372 | 410.9   | 406    | 472 | 50194               | 56        |
| 2/8/2017 E  | 371 | 411.4   | 407    | 478 | 61401               | 104       |
| 2/8/2017 M  | 356 | 416.7   | 419    | 464 | 57292               | 78        |
| 2/8/2017 S  | 353 | 412.3   | 407    | 443 | 38997               | 43        |
| 9/8/2017 E  | 354 | 410.9   | 406    | 467 | 62980               | 81        |
| 9/8/2017 S  | 363 | 418.7   | 423    | 474 | 63583               | 106       |
| 23/8/2017 E | 366 | 410.7   | 406    | 474 | 62511               | 87        |
| 23/8/2017 S | 371 | 411.8   | 407    | 455 | 51774               | 50        |
| 30/8/2017 E | 368 | 410.2   | 405    | 462 | 43059               | 60        |
| 30/8/2017 S | 358 | 411.0   | 407    | 479 | 55959               | 58        |
| 27/9/2017 E | 372 | 411.0   | 407    | 459 | 26173               | 21        |
| 27/9/2017 S | 356 | 416.6   | 422    | 464 | 38156               | 49        |
| 4/10/2017 E | 357 | 413.3   | 420    | 439 | 47124               | 64        |
| 4/10/2017 S | 351 | 414.1   | 419    | 480 | 58204               | 98        |

**Table S3.** Physico-chemical parameters measured in Lake Varese in 2016. Physico-chemical parameters measured at different depths (Epi 0.5 m - E; 2.5x Secchi - S and Meso 13 m - M) in Lake Varese during the indicated sampling dates. The table shows mean and standard deviation (n=3) calculated for each parameter.

| Date of Sampling | Parameters and Unit of Measurement                         |       | E (0.5 m)     | S (*)        | M (13 m)     |
|------------------|------------------------------------------------------------|-------|---------------|--------------|--------------|
| 31/8/2016        | Water Temperature (°C)                                     | (WT)  | 25 ± 0.0      | 9.3 ± 0.1    | 9.3 ± 0.1    |
|                  | Conductivity (µS/cm at 25°C)                               | (CD)  | 242 ± 0.0     | 313.3 ± 1.2  | 313.3 ± 1.2  |
|                  | Dissolved oxygen (mg/L)                                    | (DO)  | 9.7 ± 0.0     | 0.0 ± 0.0    | 0.0 ± 0.0    |
|                  | Oxygen saturation (%)                                      | (OS)  | 120.7 ± 0.4   | 0.0 ± 0.0    | 0.0 ± 0.0    |
|                  | Photosynthetically active radiation (µE/m <sup>2</sup> /s) | (PAR) | 126.8 ± 38.9  | 6 ± 0.0      | 6 ± 0.0      |
|                  | Oxidation Reduction Potential (mV)                         | (ORP) | 134.3 ± 0.5   | -141.7 ± 1.2 | -141.7 ± 1.2 |
|                  | pH                                                         | pH    | 8.5 ± 0.0     | 7.1 ± 0.0    | 7.1 ± 0.0    |
| 7/9/2016         | Water Temperature (°C)                                     | (WT)  | 24.8 ± 0.0    | 15 ± 0.2     | 10.2 ± 0.1   |
|                  | Conductivity (µS/cm at 25°C)                               | (CD)  | 242 ± 0.0     | 307.7 ± 0.6  | 316.3 ± 0.6  |
|                  | Dissolved oxygen (mg/L)                                    | (DO)  | 8.2 ± 0.0     | 1.1 ± 0.0    | 0 ± 0.0      |
|                  | Oxygen saturation (%)                                      | (OS)  | 101.8 ± 0.1   | 10.8 ± 0.0   | 0 ± 0        |
|                  | Photosynthetically active radiation (µE/m <sup>2</sup> /s) | (PAR) | 485.5 ± 275.5 | 13 ± 0.0     | 6 ± 0.0      |
|                  | Oxidation Reduction Potential (mV)                         | (ORP) | 182.5 ± 0.5   | 193 ± 0.0    | -137.3 ± 2.3 |
|                  | pH                                                         | pH    | 8.5 ± 0.0     | 7.5 ± 0.0    | 7.2 ± 0.0    |
| 14/9/2016        | Water Temperature (°C)                                     | (WT)  | 25.2 ± 0.0    | 16.8 ± 0.0   | 9.7 ± 0.0    |
|                  | Conductivity (µS/cm at 25°C)                               | (CD)  | 243 ± 0.0     | 308.7 ± 0.6  | 322.3 ± 0.6  |
|                  | Dissolved oxygen (mg/L)                                    | (DO)  | 8.8 ± 0.0     | 0.1 ± 0.0    | 0 ± 0.0      |
|                  | Oxygen saturation (%)                                      | (OS)  | 109.2 ± 0.0   | 1.3 ± 0.1    | 0 ± 0.0      |
|                  | Photosynthetically active radiation (µE/m <sup>2</sup> /s) | (PAR) | 485.7 ± 2.5   | 10 ± 0.0     | 6 ± 0.0      |
|                  | Oxidation Reduction Potential (mV)                         | (ORP) | 192.3 ± 0.6   | 212 ± 0.0    | -157 ± 0.0   |
|                  | pH                                                         | pH    | 8.4 ± 0.0     | 7.3 ± 0.0    | 7 ± 0.0      |
| 21/9/2016        | Water Temperature (°C)                                     | (WT)  | 22.2 ± 0.0    | 15.8 ± 0.0   | 10.1 ± 0.0   |
|                  | Conductivity (µS/cm at 25°C)                               | (CD)  | 248 ± 0.0     | 313 ± 1.0    | 321 ± 0.0    |
|                  | Dissolved oxygen (mg/L)                                    | (DO)  | 8.5 ± 0.0     | 0 ± 0.0      | 0 ± 0.0      |
|                  | Oxygen saturation (%)                                      | (OS)  | 100.4 ± 0.0   | 0.2 ± 0.1    | 0 ± 0.0      |

|           |                                                                           |       |                    |                 |                  |
|-----------|---------------------------------------------------------------------------|-------|--------------------|-----------------|------------------|
|           | Photosynthetically active radiation ( $\mu\text{E}/\text{m}^2/\text{s}$ ) | (PAR) | $76.3 \pm 2.5$     | $7 \pm 0.0$     | $6 \pm 0.0$      |
|           | Oxidation Reduction Potential (mV)                                        | (ORP) | $205.7 \pm 0.6$    | $150.7 \pm 2.9$ | $-153.3 \pm 0.6$ |
|           | pH                                                                        | pH    | $8.3 \pm 0.0$      | $7.3 \pm 0.0$   | $7.1 \pm 0.0$    |
| 28/9/2016 | Water Temperature ( $^{\circ}\text{C}$ )                                  | (WT)  | $21.7 \pm 0.0$     | $12.5 \pm 0.0$  | $9.7 \pm 0.0$    |
|           | Conductivity ( $\mu\text{S}/\text{cm}$ at $25^{\circ}\text{C}$ )          | (CD)  | $246 \pm 0.0$      | $315 \pm 0.0$   | $318 \pm 0.0$    |
|           | Dissolved oxygen (mg/L)                                                   | (DO)  | $9 \pm 0.0$        | $0 \pm 0.0$     | $0 \pm 0.0$      |
|           | Oxygen saturation (%)                                                     | (OS)  | $103.9 \pm 0.1$    | $0 \pm 0.0$     | $0 \pm 0.0$      |
|           | Photosynthetically active radiation ( $\mu\text{E}/\text{m}^2/\text{s}$ ) | (PAR) | $195 \pm 18.4$     | $6 \pm 0.0$     | $6 \pm 0.0$      |
|           | Oxidation Reduction Potential (mV)                                        | (ORP) | $155 \pm 0.0$      | $-14.3 \pm 9.2$ | $-175 \pm 0.0$   |
|           | pH                                                                        | pH    | $8.5 \pm 0.0$      | $7.2 \pm 0.0$   | $7.1 \pm 0.0$    |
| 5/10/2016 | Water Temperature ( $^{\circ}\text{C}$ )                                  | (WT)  | $20.4 \pm 0.0$     | $10 \pm 0.0$    | $10 \pm 0.0$     |
|           | Conductivity ( $\mu\text{S}/\text{cm}$ at $25^{\circ}\text{C}$ )          | (CD)  | $252 \pm 0.0$      | $319 \pm 0.0$   | $319 \pm 0.0$    |
|           | Dissolved oxygen (mg/L)                                                   | (DO)  | $8 \pm 0.0$        | $0 \pm 0.0$     | $0 \pm 0.0$      |
|           | Oxygen saturation (%)                                                     | (OS)  | $91.3 \pm 0.1$     | $0 \pm 0.0$     | $0 \pm 0.0$      |
|           | Photosynthetically active radiation ( $\mu\text{E}/\text{m}^2/\text{s}$ ) | (PAR) | $2265.3 \pm 154.7$ | $6 \pm 0.0$     | $6 \pm 0.0$      |
|           | Oxidation Reduction Potential (mV)                                        | (ORP) | $-51.3 \pm 0.6$    | $-152.0 \pm 2$  | $-152.0 \pm 2$   |
|           | pH                                                                        | pH    | $8.3 \pm 0.0$      | $7.2 \pm 0.0$   | $7.2 \pm 0.0$    |

(\*) S depth: 13 m on 31/8/2016; 7.6 m on 7/9/2016; 8 m on 14/9/2016; 7.8 m on 21/9/2016; 10.3 m on 28/9/2016 and 13 m on 5/10/2016

**Table S4.** Physico-chemical parameters measured in Lake Varese in 2017. Physico-chemical parameters measured at different depths (Epi 0.5 m - E; 2.5x Secchi - S and Meso 13 m - M) in Lake Varese during the indicated sampling dates. The table shows mean and standard deviation (n=3) of each sampling campaign, except for the campaign on 2/8/2017 where only one measurement was taken at each depth.

| Date of Sampling | Parameter and Unit of Measurements                         |       | E (0.5 m)    | S (*)       | M (13 m)     |
|------------------|------------------------------------------------------------|-------|--------------|-------------|--------------|
| 2/8/2017         | Water Temperature (°C)                                     | (WT)  | 27.2         | 26.4        | 9.5          |
|                  | Conductivity (µS/cm at 25°C)                               | (CD)  | n.d.         | 210.4       | 224.2        |
|                  | Dissolved oxygen (mg/L)                                    | (DO)  | 10.54        | 11.2        | 0.5          |
|                  | Oxygen saturation (%)                                      | (OS)  | 133          | 139.5       | 4.5          |
|                  | Photosynthetically active radiation (µE/m <sup>2</sup> /s) | (PAR) | n.d.         | 235.9       | 0            |
|                  | Oxidation Reduction Potential (mV)                         | (ORP) | n.d.         | 26.4        | -125.7       |
|                  | pH                                                         | pH    | 8.9          | 8.9         | 7.5          |
| 9/8/2017         | Water Temperature (°C)                                     | (WT)  | 25.6 ± 0.0   | 24 ± 0.0    | 8.7 ± 0.0    |
|                  | Conductivity (µS/cm at 25°C)                               | (CD)  | 205.3 ± 0,6  | 236.7 ± 1,2 | 306 ± 0,0    |
|                  | Dissolved oxygen (mg/L)                                    | (DO)  | 8.3 ± 0,0    | 5 ± 0.1     | 0.27 ± 0.0   |
|                  | Oxygen saturation (%)                                      | (OS)  | 102.7 ± 0.2  | 60 ± 0.8    | 2.3 ± 0.0    |
|                  | Photosynthetically active radiation (µE/m <sup>2</sup> /s) | (PAR) | 442.3 ± 1.2  | 9 ± 0.0     | 6 ± 0.0      |
|                  | Oxidation Reduction Potential (mV)                         | (ORP) | 229.7 ± 0.6  | 217 ± 0.0   | -164.3 ± 0.6 |
|                  | pH                                                         | pH    | 8.7 ± 0.0    | 7.9 ± 0.0   | 7.2 ± 0.0    |
| 23/8/2017        | Water Temperature (°C)                                     | (WT)  | 25.1 ± 0.0   | 24.3 ± 0.0  | 9.2 ± 0.0    |
|                  | Conductivity (µS/cm at 25°C)                               | (CD)  | 195 ± 0.0    | 208.7 ± 0.6 | 306 ± 0.0    |
|                  | Dissolved oxygen (mg/L)                                    | (DO)  | 11.1 ± 0.0   | 9.2 ± 0.2   | 0.3 ± 0.0    |
|                  | Oxygen saturation (%)                                      | (OS)  | 136.3 ± 0,2  | 111 ± 2.7   | 2.3 ± 0.0    |
|                  | Photosynthetically active radiation (µE/m <sup>2</sup> /s) | (PAR) | 155.3 ± 15.6 | 21 ± 0.0    | 6 ± 0.0      |
|                  | Oxidation Reduction Potential (mV)                         | (ORP) | 283.3 ± 0.6  | 262 ± 0.0   | -157 ± 0.0   |
|                  | pH                                                         | pH    | 9.1 ± 0.0    | 8.5 ± 0.0   | 7.2 ± 0.0    |
| 30/8/2017        | Water Temperature (°C)                                     | (WT)  | 26.1 ± 0.0   | 23.9 ± 0.0  | 9.2 ± 0.0    |
|                  | Conductivity (µS/cm at 25°C)                               | (CD)  | 172.7 ± 0.6  | 239.7 ± 0.6 | 312 ± 0.0    |
|                  | Dissolved oxygen (mg/L)                                    | (DO)  | 8.8 ± 0.1    | 2.2 ± 0.4   | 0.2 ± 0.0    |

|           |                                                            |       |             |             |              |
|-----------|------------------------------------------------------------|-------|-------------|-------------|--------------|
|           | Oxygen saturation (%)                                      | (OS)  | 110 ± 1.2   | 26.3 ± 5.1  | 1.7 ± 0.0    |
|           | Photosynthetically active radiation (μE/m <sup>2</sup> /s) | (PAR) | 225.7 ± 6.4 | 12 ± 0.0    | 6 ± 0.0      |
|           | Oxidation Reduction Potential (mV)                         | (ORP) | 249.3 ± 1.2 | 273 ± 0.0   | -39.7 ± 0.6  |
|           | pH                                                         | pH    | 7.7 ± 0.0   | 6.3 ± 0.0   | 5.6 ± 0.0    |
| 27/9/2017 | Water Temperature (°C)                                     | (WT)  | 19.9 ± 0.0  | 15.3 ± 0.1  | 9.8 ± 0.0    |
|           | Conductivity (μS/cm at 25°C)                               | (CD)  | 185 ± 0.0   | 273 ± 0.0   | 281.3 ± 0.6  |
|           | Dissolved oxygen (mg/L)                                    | (DO)  | 10.2 ± 0.0  | 0.5 ± 0.0   | 0.3 ± 0.0    |
|           | Oxygen saturation (%)                                      | (OS)  | 113.9 ± 0.2 | 5.1 ± 0.1   | 2.4 ± 0.0    |
|           | Photosynthetically active radiation (μE/m <sup>2</sup> /s) | (PAR) | 151.7 ± 2.3 | 8 ± 0.0     | 6 ± 0.0      |
|           | Oxidation Reduction Potential (mV)                         | (ORP) | 134 ± 0.0   | 170.3 ± 0.6 | -163.7 ± 1.2 |
|           | pH                                                         | pH    | 8.6 ± 0.0   | 7.3 ± 0.0   | 7.2 ± 0.0    |
| 4/10/2017 | Water Temperature (°C)                                     | (WT)  | 19.5 ± 0.0  | 10.8 ± 0.0  | 9.5 ± 0.0    |
|           | Conductivity (μS/cm at 25°C)                               | (CD)  | 186 ± 0.0   | 281 ± 0.0   | 284 ± 0.0    |
|           | Dissolved oxygen (mg/L)                                    | (DO)  | 10.5 ± 0.0  | 0.3 ± 0.0   | 0.3 ± 0.0    |
|           | Oxygen saturation (%)                                      | (OS)  | 115.9 ± 0.1 | 2.4 ± 0.0   | 2.4 ± 0.0    |
|           | Photosynthetically active radiation (μE/m <sup>2</sup> /s) | (PAR) | 388 ± 0.0   | 6 ± 0.0     | 6 ± 0.0      |
|           | Oxidation Reduction Potential (mV)                         | (ORP) | 128 ± 0.0   | -10.3 ± 0.6 | -48.3 ± 0.6  |
|           | pH                                                         | pH    | 8.9 ± 0.0   | 7.3 ± 0.0   | 7.2 ± 0.0    |

(\*) S depth corresponded to the water depth of 2 m on 2/8/2017; 6 m on 9/8/2017; 5 m on 23/8/2017 and 30/8/2017; 8.75 m on 27/9/2017 and 11 m on 4/10/2017. n.d. stands for not determined

**Table S5.** Nutrients measured in Lake Varese. Nutrients measured at different depths (Epi 0.5 m - E; 2.5x Secchi - S and Meso 13 m - M) in Lake Varese during the indicated sampling dates.

| Date of Sampling and Depth of Measurements | Laboratory | Nutrients (mg/L)             |                              |                               |                  |
|--------------------------------------------|------------|------------------------------|------------------------------|-------------------------------|------------------|
|                                            |            | NO <sub>3</sub> <sup>-</sup> | NH <sub>4</sub> <sup>+</sup> | SO <sub>4</sub> <sup>2-</sup> | Total Phosphorus |
|                                            | LOD (BO)   | n.d.                         | n.d.                         | n.d.                          | 0.05             |
|                                            | LOD (JRC)  | 0.049                        | 0.02                         | 0.002                         | n.d.             |
|                                            | LOQ (JRC)  | 0.086                        | 0.02                         | 0.004                         | n.d.             |
| 31/8/2016 E                                | BO         | n.d.                         | n.d.                         | n.d.                          | < LOD            |
| 31/8/2016 M                                | JRC        | < LOD                        | 0.468                        | 7.1                           | n.d.             |
| 31/8/2016 S                                | JRC        | < LOD                        | 0.468                        | 7.1                           | n.d.             |
| 7/9/2016 E                                 | BO         | n.d.                         | n.d.                         | n.d.                          | 0.08             |
| 7/9/2016 S                                 | JRC        | < LOD                        | < LOD                        | 6.9                           | n.d.             |
| 7/9/2016 M                                 | JRC        | < LOD                        | 0.391                        | 6.9                           | n.d.             |
| 14/9/2016 E                                | BO         | n.d.                         | n.d.                         | n.d.                          | 0.06             |
| 14/9/2016 M                                | JRC        | < LOD                        | 0.51                         | 6.4                           | n.d.             |
| 21/9/2016 E                                | BO         | n.d.                         | n.d.                         | n.d.                          | 0.06             |
| 21/9/2016 S                                | JRC        | 0.062                        | < LOD                        | 6.6                           | n.d.             |
| 21/9/2016 M                                | JRC        | < LOD                        | 0.417                        | 6.5                           | n.d.             |
| 28/9/2016 E                                | BO         | n.d.                         | n.d.                         | n.d.                          | 0.26             |
| 5/10/2016 E                                | BO         | n.d.                         | n.d.                         | n.d.                          | < LOD            |
| 19/7/2017 E                                | JRC        | < LOD                        | < LOD                        | 6.7                           | n.d.             |
| 19/7/2017 S                                | JRC        | < LOD                        | < LOD                        | 6.8                           | n.d.             |
| 19/7/2017 M                                | JRC        | 0.066                        | 0.311                        | 6.8                           | n.d.             |
| 26/7/2017 E                                | JRC        | < LOD                        | < LOD                        | 5.5                           | n.d.             |
| 26/7/2017 S                                | JRC        | < LOD                        | < LOD                        | 6.5                           | n.d.             |
| 26/7/2017 M                                | JRC        | < LOD                        | 0.319                        | 7                             | n.d.             |
| 2/8/2017 E                                 | JRC        | < LOD                        | < LOD                        | 6.5                           | n.d.             |
| 2/8/2017 S                                 | JRC        | < LOD                        | < LOD                        | 6.3                           | n.d.             |
| 2/8/2017 M                                 | JRC        | < LOD                        | < LOD                        | 6.3                           | n.d.             |
| 9/8/2017 E                                 | JRC        | < LOD                        | < LOD                        | 6.1                           | n.d.             |
| 9/8/2017 S                                 | JRC        | < LOD                        | < LOD                        | 6.2                           | n.d.             |
| 9/8/2017 M                                 | JRC        | < LOD                        | 0.545                        | 6                             | n.d.             |
| 23/8/2017 E                                | JRC        | < LOD                        | < LOD                        | 6                             | n.d.             |
| 23/8/2017 S                                | JRC        | < LOD                        | < LOD                        | 6                             | n.d.             |
| 23/8/2017 M                                | JRC        | < LOD                        | 0.47                         | 5.3                           | n.d.             |
| 30/8/2017 E                                | JRC        | < LOD                        | < LOD                        | 5.7                           | n.d.             |
| 30/8/2017 S                                | JRC        | < LOD                        | < LOD                        | 5.9                           | n.d.             |



|             |     |       |       |     |      |
|-------------|-----|-------|-------|-----|------|
| 30/8/2017 M | JRC | < LOD | 0.65  | 4.6 | n.d. |
| 27/9/2017 E | JRC | < LOD | < LOD | 5.5 | n.d. |
| 27/9/2017 S | JRC | < LOD | 0.07  | 5.8 | n.d. |
| 27/9/2017 M | JRC | < LOD | 0.676 | 2.3 | n.d. |
| 4/10/2017 E | JRC | < LOD | < LOD | 5.7 | n.d. |
| 4/10/2017 S | JRC | < LOD | 0.406 | 3.3 | n.d. |
| 4/10/2017 M | JRC | < LOD | 0.831 | 2.1 | n.d. |

(\*) S depth: 13 m on 31/8/2016; 7.6 m on 7/9/2016; 7.8 m on 21/9/2016; 5m on 19/7/2017 and 26/7/2017; 2 m on 2/8/2017; 6 m on 9/8/2017; 5 m on 23/8/2017 and 30/8/2017; 8.75 m on 27/9/2017 and 11 m on 4/10/2017. n.d. stands for not determined. LOD stands for Limit of Detection, LOQ stands for Limit of Quantification.

**Table S6.** Chlorophyll *a* content measured in Lake Varese in 2016. Chlorophyll *a* (Chl*a*) content measured at different depths (Epi 0.5 m - E; 2.5x Secchi - S and Meso 13 m - M) in Lake Varese during the indicated sampling dates.

| Date of sampling     | Chl <i>a</i> content (µg/L) |              |          |
|----------------------|-----------------------------|--------------|----------|
|                      | <b>E</b>                    | <b>S (*)</b> | <b>M</b> |
| <b>31/8/2016</b>     | 6.65                        | 1.60         | 1.60     |
| <b>7/9/2016</b>      | 5.10                        | 14.52        | 2.04     |
| <b>14/9/2016</b>     | 5.17                        | 15.42        | 4.72     |
| <b>21/9/2016</b>     | 12.84                       | 10.23        | 4.05     |
| <b>28/9/2016</b>     | 1.48                        | 3.80         | 0.81     |
| <b>5/10/2016</b>     | 3.35                        | 4.15         | 4.15     |
| <b>Average (Avg)</b> | 5.77                        | 8.29         | 2.89     |

(\*) S depth: 13 m on 31/8/2016; 7.6 m on 7/9/2016; 8 m on 14/9/2016; 7.8 m on 21/9/2016; 10.3 m on 28/9/2016 and 13 m on 5/10/2016

**Table S7.** Chlorophyll *a* content measured in Lake Varese in 2017. Chlorophyll *a* (Chl*a*) content measured at different depths (Epi 0.5 m - E; 2.5x Secchi - S and Meso 13 m - M) in Lake Varese during the 2017 campaign.

| Date of sampling     | Chl <i>a</i> content (µg/L) |              |          |
|----------------------|-----------------------------|--------------|----------|
|                      | <b>E</b>                    | <b>S (*)</b> | <b>M</b> |
| <b>19/7/2017</b>     | 10.70                       | 7.10         | 2.90     |
| <b>26/7/2017</b>     | 18.30                       | 18.14        | 3.30     |
| <b>2/8/2017</b>      | 7.00                        | 14.00        | 22.00    |
| <b>9/8/2017</b>      | 19.20                       | 13.20        | 2.40     |
| <b>23/8/2017</b>     | 12.00                       | 19.00        | 2.80     |
| <b>30/8/2017</b>     | 14.20                       | 22.40        | 3.20     |
| <b>27/9/2017</b>     | 11.00                       | 7.20         | 7.40     |
| <b>4/10/2017</b>     | 4.10                        | 7.90         | 3.00     |
| <b>Average (Avg)</b> | 12.06                       | 13.62        | 5.88     |

(\*) S depth: 5 m on 19/7/2017, 26/7/2017; 2 m on 2/8/2017; 6 m on 9/8/2017; 5 m on 23/8/2017 and 30/8/2017; 8.75 m on 27/9/2017 and 11 m on 4/10/2017

**Table S8.** MegaHit shotgun contig overview. Number, length and N50 value of MegaHit contigs obtained from the shotgun data. Also reported is the number of contigs in the indicated length interval. Epi 0.5 m - E; 2.5x Secchi - S and Meso 13 m – M.

| Dataset     | # of contigs | max length | Contig length |         |         |       |        |        |
|-------------|--------------|------------|---------------|---------|---------|-------|--------|--------|
|             |              |            | > 100000      | > 50000 | > 10000 | >5000 | >=1000 | <1000  |
| 31/8/2016 E | 73519        | 42318      |               |         | 33      | 90    | 5208   | 68188  |
| 31/8/2016 M | 76356        | 51444      |               | 1       | 322     | 690   | 7252   | 68091  |
| 7/9/2016 E  | 76356        | 51444      |               | 1       | 322     | 690   | 7252   | 68091  |
| 7/9/2016 S  | 76760        | 67674      |               | 2       | 52      | 248   | 8126   | 68332  |
| 14/9/2016 E | 80943        | 67784      |               | 2       | 92      | 451   | 9865   | 70533  |
| 14/9/2016 S | 63170        | 136338     | 3             | 9       | 113     | 155   | 5105   | 57785  |
| 21/9/2016 E | 97602        | 377841     | 13            | 19      | 147     | 248   | 8916   | 88259  |
| 21/9/2016 S | 125014       | 83200      |               | 1       | 192     | 482   | 14299  | 110040 |
| 19/7/2017 E | 446482       | 152833     | 7             | 77      | 1213    | 2552  | 58178  | 384455 |
| 19/7/2017 M | 460474       | 286300     | 16            | 53      | 1249    | 2634  | 60581  | 395941 |
| 19/7/2017 S | 345883       | 189922     | 5             | 34      | 952     | 2060  | 43741  | 299091 |
| 26/7/2017 E | 367568       | 183641     | 5             | 39      | 953     | 2045  | 46146  | 318380 |
| 2/8/2017 E  | 475171       | 204199     | 6             | 51      | 1391    | 2899  | 57266  | 413558 |
| 2/8/2017 M  | 426540       | 222241     | 26            | 76      | 867     | 2181  | 53888  | 369502 |
| 9/8/2017 E  | 358842       | 204210     | 6             | 60      | 966     | 2021  | 48052  | 307737 |
| 9/8/2017 M  | 443524       | 394439     | 18            | 53      | 1233    | 3105  | 56841  | 382274 |
| 23/8/2017 E | 332128       | 217027     | 24            | 59      | 1161    | 2436  | 43211  | 285237 |
| 23/8/2017 S | 310075       | 224316     | 18            | 73      | 1054    | 2072  | 42605  | 264253 |
| 30/8/2017 E | 361139       | 220278     | 12            | 65      | 982     | 2013  | 43278  | 314789 |
| 30/8/2017 S | 370783       | 314525     | 11            | 73      | 1049    | 2104  | 45455  | 322091 |
| 27/9/2017 E | 431948       | 249947     | 14            | 52      | 1217    | 2601  | 60031  | 368033 |
| 27/9/2017 S | 459518       | 154350     | 5             | 24      | 1351    | 3233  | 56569  | 398336 |
| 4/10/2017 E | 362357       | 282165     | 12            | 28      | 952     | 2600  | 50995  | 307770 |
| 4/10/2017 S | 445017       | 821984     | 28            | 64      | 943     | 2248  | 51512  | 390222 |

**Table S9.** Conservation of MegaHit shotgun contigs in samples. Conservation of MegaHit contigs across all samples collected in 2017 as determined by BLASTN. Only matches with 99% sequence identity and with a match alignment length  $\geq 50\%$  of the length of the query contig are reported. Values are contig coverage values (displayed as rounded integers) obtained from MegaHit for the matched sample normalized for the total number of read pairs in each sample. Rightmost column: Lr = *Lyngbya robusta* genome assembly (*Limnoraphis robusta* CS-951.); L. sp = *Lyngbya* spp. PCC 8106 1099428180450). Only a subset of matching contigs (longest) are shown due to space limitations. Sample 30/8/2017 E with the highest number of *Lyngbya robusta* matches in the Kraken2 analysis is indicated in yellow. Epi 0.5 m - E; 2.5x Secchi - S and Meso 13 m - M.

| Contig                  | Length | 19/7/2017 E | 19/7/2017 S | 19/7/2017 M | 26/7/2017 E | 2/8/2017 E | 2/8/2017 M | 9/9/2017 E | 9/8/2017 M | 23/8/2017 E | 23/8/2017 S | 30/8/2017 E | 30/8/2017 S | 27/9/2017 E | 27/9/2017 S | 4/10/2017 E | 4/10/2017 S | Genome |
|-------------------------|--------|-------------|-------------|-------------|-------------|------------|------------|------------|------------|-------------|-------------|-------------|-------------|-------------|-------------|-------------|-------------|--------|
| k141_237689_9/8/2017 E  | 137961 | 6           |             |             | 10          |            |            | 9          |            | 6           | 9           | 12          | 8           | 11          |             |             |             | Lr     |
| k141_920_26/7/2017 E    | 132558 | 6           |             |             | 10          |            |            | 9          |            |             |             |             |             | 11          |             |             |             | Lr     |
| k141_80290_23/8/2017 S  | 130786 |             |             |             |             |            |            |            |            |             | 9           |             |             |             |             |             |             | Lr     |
| k141_56948_23/8/2017 E  | 129595 |             |             |             |             |            |            | 9          |            | 6           | 9           | 12          | 8           | 11          |             |             |             | Lr     |
| k141_276541_19/7/2017 E | 118925 | 7           |             |             | 11          |            |            |            |            | 6           | 9           | 12          | 8           | 10          |             |             |             | Lr     |
| k141_127895_19/7/2017 E | 115593 | 6           |             |             | 10          |            | 5          | 9          |            | 6           | 9           | 12          | 8           | 11          |             |             |             | Lr     |
| k141_187606_9/8/2017 E  | 108071 |             |             |             |             |            | 5          | 9          |            | 6           | 9           | 12          | 8           | 9           |             |             |             | Lr     |
| k141_29433_23/8/2017 E  | 107952 |             |             |             |             |            | 5          | 9          |            | 6           | 9           | 12          | 8           |             |             |             |             | Lr     |
| k141_182921_30/8/2017 E | 98087  |             |             |             |             |            |            | 9          |            |             | 9           | 12          | 8           |             |             |             |             | Lr     |
| k141_183280_30/8/2017 E | 97073  |             |             |             |             |            |            | 9          |            | 6           | 9           | 12          | 8           |             |             |             |             | Lr     |
| k141_62685_27/9/2017 E  | 95824  | 6           |             |             | 10          |            | 5          | 9          |            | 6           | 9           | 12          | 8           | 11          |             |             |             | Lr     |
| k141_4749_2/8/2017 M    | 92338  |             |             |             |             |            | 5          | 9          |            | 6           | 9           | 12          | 8           | 9           |             |             |             | Lr     |
| k141_26964_30/8/2017 E  | 91750  |             |             |             |             |            | 5          | 9          |            | 6           | 9           | 12          | 8           |             |             |             |             | Lr     |
| k141_64076_27/9/2017 E  | 91715  |             |             |             |             |            | 5          | 9          |            |             |             |             |             | 9           |             |             |             | Lr     |
| k141_3669_23/8/2017 E   | 91333  |             |             |             |             |            |            | 9          |            | 6           | 9           | 12          | 8           |             |             |             |             | Lr     |
| k141_29439_19/7/2017 E  | 91304  | 7           |             |             |             |            |            |            |            |             |             |             |             |             |             |             |             | Lr     |
| k141_149995_9/8/2017 E  | 91026  |             |             |             |             |            |            | 9          |            | 6           | 9           | 12          | 8           |             |             |             |             | Lr     |
| k141_45444_19/7/2017 E  | 87494  | 7           |             |             |             |            | 5          |            |            |             |             |             |             | 9           |             |             |             | Lr     |
| k141_15288_23/8/2017 S  | 85075  |             |             |             |             |            |            |            |            |             | 9           |             |             |             |             |             |             | Lr     |
| k141_187559_30/8/2017 E | 84966  |             |             |             |             |            |            |            |            | 7           |             | 12          |             |             |             |             |             | Lr     |
| k141_55121_23/8/2017 S  | 84824  | 6           |             |             | 10          |            | 5          | 9          |            | 6           | 9           | 12          | 8           | 11          |             |             |             | Lr     |
| k141_92268_30/8/2017 S  | 84794  | 6           |             |             | 10          |            | 5          | 9          |            | 6           | 9           | 12          | 8           | 11          |             |             |             | Lr     |
| k141_64012_30/8/2017 E  | 84528  | 6           |             |             | 10          |            | 5          | 9          |            | 6           | 9           | 12          | 8           | 11          |             |             |             | Lr     |
| k141_4042_30/8/2017 S   | 84237  |             |             |             | 11          |            |            | 9          |            | 6           | 9           | 12          | 8           | 10          |             |             |             | Lr     |
| k141_39993_9/8/2017 E   | 83609  | 7           |             |             | 11          |            |            | 9          |            | 6           | 9           | 12          | 8           | 10          |             |             |             | Lr     |
| k141_272525_27/9/2017 E | 83419  | 7           | 5           |             | 10          |            |            | 9          |            | 6           | 9           | 12          | 9           | 9           |             |             |             | Lr     |
| k141_167885_23/8/2017 S | 83411  | 7           |             |             | 11          |            |            | 9          |            | 6           | 9           | 12          | 8           | 10          |             |             |             | Lr     |
| k141_102025_30/8/2017 E | 83411  | 7           |             |             | 11          |            |            | 9          |            | 6           | 9           | 12          | 8           | 10          |             |             |             | Lr     |
| k141_219532_26/7/2017 E | 83392  | 7           |             |             | 11          |            |            | 9          |            | 6           | 9           | 12          | 8           | 10          |             |             |             | Lr     |
| k141_145744_23/8/2017 E | 83195  |             |             |             |             |            | 5          | 9          |            | 7           | 9           | 12          | 8           | 9           |             |             |             | Lr     |
| k141_230547_27/9/2017 E | 83083  | 7           |             |             | 11          |            |            | 9          |            | 6           | 9           | 12          | 8           | 10          |             |             |             | Lr     |
| k141_15786_23/8/2017 E  | 82525  | 7           |             |             | 11          |            |            | 9          |            | 6           | 9           | 12          | 8           | 10          |             |             |             | Lr     |
| k141_7683_30/8/2017 E   | 82274  |             |             |             |             |            | 5          | 9          |            | 7           | 9           | 12          | 8           | 9           |             |             |             | Lr     |
| k141_115161_23/8/2017 S | 82227  |             |             |             |             |            | 5          | 9          |            | 7           | 9           | 12          | 8           | 9           |             |             |             | Lr     |
| k141_124844_30/8/2017 S | 81537  |             |             |             |             |            | 5          | 9          |            | 7           | 9           | 12          | 8           | 9           |             |             |             | Lr     |
| k141_41843_30/8/2017 S  | 81053  | 6           |             |             |             |            |            |            |            | 6           | 9           | 12          | 8           |             |             |             |             | Lr     |
| k141_153488_27/9/2017 E | 79271  |             |             |             |             |            | 5          |            |            | 7           | 9           | 12          | 8           | 9           |             |             |             | Lr     |
| k141_143859_19/7/2017 E | 77837  | 7           |             |             |             |            |            |            |            |             |             |             |             |             |             |             |             | Lr     |
| k141_59614_30/8/2017 E  | 77625  |             |             |             |             |            |            |            |            |             |             | 12          |             |             |             |             |             | Lr     |
| k141_211040_30/8/2017 E | 77440  |             |             |             | 11          |            | 5          | 9          |            | 7           | 9           | 12          | 8           | 10          |             |             |             | Lr     |
| k141_185490_23/8/2017 S | 77440  |             |             |             | 11          |            | 5          | 9          |            | 7           | 9           | 12          | 8           | 10          |             |             |             | Lr     |
| k141_220184_30/8/2017 S | 77440  |             |             |             | 11          |            | 5          | 9          |            | 7           | 9           | 12          | 8           | 10          |             |             |             | Lr     |
| k141_62850_9/8/2017 E   | 77337  |             |             |             | 11          |            | 5          | 9          |            | 7           | 9           | 12          | 8           | 10          |             |             |             | Lr     |
| k141_52389_23/8/2017 S  | 77212  |             |             |             |             |            |            |            |            |             | 9           |             | 8           | 10          |             |             |             | Lr     |
| k141_157016_30/8/2017 E | 76892  |             |             |             |             |            | 5          |            |            | 7           | 9           | 12          | 8           | 9           |             |             |             | Lr     |
| k141_50119_23/8/2017 S  | 76860  |             |             |             |             |            | 5          |            |            | 7           | 9           | 12          | 8           | 9           |             |             |             | Lr     |
| k141_188362_30/8/2017 S | 75820  | 7           |             |             |             |            |            | 9          |            | 6           | 9           | 12          | 8           |             |             |             |             | Lr     |
| k141_810_9/8/2017 E     | 75730  | 7           |             |             |             |            |            | 9          |            | 6           | 9           | 12          | 8           |             |             |             |             | Lr     |
| k141_68736_30/8/2017 E  | 75646  | 7           |             |             |             |            |            | 9          |            | 6           | 9           | 12          | 8           |             |             |             |             | Lr     |
| k141_28556_23/8/2017 S  | 75402  |             |             |             |             |            | 5          | 9          |            | 6           | 9           | 12          | 8           | 9           |             |             |             | Lr     |

| Contig                  | Length | 19/7/2017 E | 19/7/2017 S | 19/7/2017 M | 26/7/2017 E | 2/8/2017 E | 2/8/2017 M | 9/8/2017 E | 9/8/2017 M | 23/8/2017 E | 23/8/2017 S | 30/8/2017 E | 30/8/2017 S | 27/9/2017 E | 27/9/2017 S | 4/10/2017 E | 4/10/2017 S | Genome |
|-------------------------|--------|-------------|-------------|-------------|-------------|------------|------------|------------|------------|-------------|-------------|-------------|-------------|-------------|-------------|-------------|-------------|--------|
| k141_88875_23/8/2017 E  | 75398  | 7           |             |             |             |            |            | 8          |            | 6           | 9           | 12          | 8           |             |             |             |             | Lr     |
| k141_3751_30/8/2017 S   | 75242  |             |             |             |             |            | 5          | 8          |            | 6           | 9           | 12          | 8           | 9           |             |             |             | Lr     |
| k141_151132_23/8/2017 E | 74738  |             |             |             | 11          |            | 5          | 8          |            | 7           | 10          | 12          | 8           | 10          |             |             |             | Lr     |
| k141_113406_27/9/2017 E | 74707  | 7           |             |             |             |            |            |            |            | 6           |             | 11          | 8           | 9           |             |             |             | Lr     |
| k141_19724_19/7/2017 E  | 74007  | 7           | 5           |             | 10          |            |            | 9          |            | 6           | 10          | 12          | 9           | 9           |             |             |             | Lr     |
| k141_158256_19/7/2017 E | 72755  | 7           |             |             |             |            |            | 8          |            |             |             |             |             |             |             |             |             | Lr     |
| k141_2354_23/8/2017 S   | 72737  |             |             |             |             |            |            | 8          |            | 6           | 9           | 12          | 8           |             |             |             |             | Lr     |
| k141_5103_30/8/2017 E   | 72541  |             |             |             |             |            |            |            |            | 6           | 9           | 12          | 8           |             |             |             |             | Lr     |
| k141_153053_30/8/2017 S | 72448  | 7           | 5           |             | 10          |            | 5          | 9          |            | 6           | 10          | 12          | 9           | 9           |             |             |             | Lr     |
| k141_29465_19/7/2017 E  | 72429  | 7           |             |             |             |            |            |            |            |             | 9           |             |             | 9           |             |             |             | Lr     |
| k141_112782_23/8/2017 S | 72298  | 7           |             |             |             |            |            | 9          |            |             | 9           | 12          | 8           | 9           |             |             |             | Lr     |
| k141_128648_30/8/2017 E | 72298  |             |             |             |             |            |            | 9          |            |             | 9           | 12          | 8           | 9           |             |             |             | Lr     |
| k141_125401_30/8/2017 S | 72298  |             |             |             |             |            |            | 9          |            |             | 9           | 12          | 8           | 9           |             |             |             | Lr     |
| k141_16852_23/8/2017 S  | 72246  | 7           |             |             | 10          | 4          | 6          | 9          |            | 6           | 10          | 12          | 8           | 10          |             |             |             | Lr     |
| k141_198644_23/8/2017 S | 71633  | 7           |             |             | 11          |            | 5          | 9          |            | 6           | 9           | 12          | 8           | 9           |             |             |             | Lr     |
| k141_14255_2/8/2017 M   | 71590  | 7           |             |             | 11          |            | 5          | 9          |            | 6           | 9           | 12          | 8           | 9           |             |             |             | Lr     |
| k141_170572_30/8/2017 E | 71532  | 7           | 5           |             | 10          |            | 5          | 9          |            | 6           | 10          | 12          | 9           | 9           |             |             |             | Lr     |
| k141_56426_23/8/2017 E  | 71521  | 7           | 5           |             | 10          |            | 5          | 9          |            | 6           | 10          | 12          | 9           | 9           |             |             |             | Lr     |
| k141_17631_9/8/2017 E   | 71478  | 7           | 5           |             | 10          |            | 5          | 9          |            | 6           | 10          | 12          | 9           | 9           |             |             |             | Lr     |
| k141_201860_23/8/2017 S | 71452  | 7           | 5           |             | 10          |            | 5          | 9          |            | 6           | 10          | 12          | 9           | 9           |             |             |             | Lr     |
| k141_290682_27/9/2017 E | 70672  | 7           |             |             | 11          |            | 5          | 9          |            | 6           | 9           | 12          | 8           | 9           |             |             |             | Lr     |
| k141_294067_19/7/2017 E | 70672  | 7           |             |             | 11          |            | 5          | 9          |            | 6           | 9           | 12          | 8           | 9           |             |             |             | Lr     |
| k141_138053_30/8/2017 E | 68679  | 7           |             |             | 11          |            | 5          | 9          |            | 6           | 9           | 12          | 8           | 9           |             |             |             | Lr     |
| k141_130544_23/8/2017 E | 68679  | 7           |             |             | 11          |            | 5          | 9          |            | 6           | 9           | 12          | 8           | 9           |             |             |             | Lr     |
| k141_146227_30/8/2017 S | 68679  | 7           |             |             | 11          |            | 5          | 9          |            | 6           | 9           | 12          | 8           | 9           |             |             |             | Lr     |
| k141_159774_26/7/2017 E | 68540  | 7           |             |             | 11          |            | 5          | 9          |            | 6           | 9           | 12          | 8           | 9           |             |             |             | Lr     |
| k141_38246_9/8/2017 E   | 68540  | 7           |             |             | 11          |            | 5          | 9          |            | 6           | 9           | 12          | 8           | 9           |             |             |             | Lr     |
| k141_87536_9/8/2017 E   | 68158  |             |             |             |             |            |            | 9          |            |             | 9           | 12          | 8           | 9           |             |             |             | Lr     |
| k141_174263_23/8/2017 S | 68086  | 6           |             |             |             |            |            | 9          |            | 6           | 9           | 12          | 8           |             |             |             |             | Lr     |
| k141_23254_2/8/2017 M   | 68063  | 7           |             |             |             |            | 5          |            |            |             |             |             |             | 9           |             |             |             | Lr     |
| k141_8330_9/8/2017 E    | 66921  | 7           |             |             |             |            |            | 8          |            | 6           | 10          | 12          | 8           | 9           |             |             |             | Lr     |
| k141_71337_30/8/2017 S  | 66677  | 7           |             |             |             |            |            | 8          |            | 6           | 10          | 12          | 8           | 9           |             |             |             | Lr     |
| k141_92856_27/9/2017 E  | 66677  | 7           |             |             |             |            |            | 8          |            | 6           | 10          | 12          | 8           | 9           |             |             |             | Lr     |
| k141_73849_30/8/2017 E  | 66677  | 7           |             |             |             |            |            | 8          |            | 6           | 10          | 12          | 8           | 9           |             |             |             | Lr     |
| k141_22592_27/9/2017 E  | 66664  | 7           |             |             | 11          |            | 5          | 9          |            | 6           | 9           | 13          | 8           | 9           |             |             |             | Lr     |
| k141_267174_2/8/2017 M  | 65736  |             |             |             |             |            | 5          | 8          |            | 7           | 10          | 12          | 8           | 8           |             |             |             | Lr     |
| k141_244830_27/9/2017 E | 64167  | 6           |             |             | 10          |            |            | 8          |            | 6           | 9           | 12          | 8           | 9           |             |             |             | Lr     |
| k141_181443_23/8/2017 S | 62849  | 7           |             |             | 10          |            | 5          | 9          |            | 7           | 9           | 12          | 8           | 9           |             |             |             | Lr     |
| k141_89388_23/8/2017 S  | 62472  | 7           |             |             |             |            | 6          | 8          |            | 6           | 10          | 12          | 8           | 9           |             |             |             | Lr     |
| k141_230676_30/8/2017 E | 62401  |             |             |             |             |            | 6          |            |            | 6           |             | 11          |             |             |             |             |             | Lr     |
| k141_196038_23/8/2017 E | 62383  |             |             |             | 10          |            |            | 8          |            | 6           | 9           | 12          | 8           | 9           |             |             |             | Lr     |
| k141_49498_19/7/2017 E  | 62336  | 6           |             |             | 10          |            | 6          |            |            |             |             |             |             |             |             |             |             | Lr     |
| k141_14982_9/8/2017 E   | 61075  |             |             |             | 10          |            | 5          | 8          |            | 7           | 9           | 12          | 8           | 9           |             |             |             | Lr     |
| k141_160653_19/7/2017 E | 60384  | 7           |             |             | 10          | 3          | 5          | 9          |            | 7           | 10          | 12          | 8           | 9           |             |             |             | Lr     |
| k141_126538_27/9/2017 E | 60384  | 7           |             |             | 10          | 3          | 5          | 9          |            | 7           | 10          | 12          | 8           | 9           |             |             |             | Lr     |
| k141_131729_30/8/2017 S | 60378  | 7           |             |             | 10          | 3          | 5          | 9          |            | 7           | 10          | 12          | 8           | 9           |             |             |             | Lr     |
| k141_214681_23/8/2017 E | 60378  | 7           |             |             | 10          | 3          | 5          | 9          |            | 7           | 10          | 12          | 8           | 9           |             |             |             | Lr     |
| k141_115755_30/8/2017 E | 60378  | 7           |             |             | 10          | 3          | 5          | 9          |            | 7           | 10          | 12          | 8           | 9           |             |             |             | Lr     |
| k141_154914_9/8/2017 E  | 60378  | 7           |             |             | 10          | 3          | 5          | 9          |            | 7           | 10          | 12          | 8           | 9           |             |             |             | Lr     |
| k141_170237_2/8/2017 M  | 60378  | 7           |             |             | 10          | 3          | 5          | 9          |            | 7           | 10          | 12          | 8           | 9           |             |             |             | Lr     |

Supplementary Material

| Contig                  | Length | 19/7/2017 E | 19/7/2017 S | 19/7/2017 M | 26/7/2017 E | 2/8/2017 E | 2/8/2017 M | 9/8/2017 E | 9/8/2017 M | 23/8/2017 E | 23/8/2017 S | 30/8/2017 E | 30/8/2017 S | 27/9/2017 E | 27/9/2017 S | 4/10/2017 E | 4/10/2017 S | Genome |
|-------------------------|--------|-------------|-------------|-------------|-------------|------------|------------|------------|------------|-------------|-------------|-------------|-------------|-------------|-------------|-------------|-------------|--------|
| k141_97764_23/8/2017 S  | 60378  | 7           |             |             | 10          | 3          | 5          | 9          |            | 7           | 10          | 12          | 8           | 9           |             |             |             | Lr     |
| k141_42996_27/9/2017 E  | 59527  | 7           | 4           |             |             |            | 5          | 9          |            | 7           | 9           | 12          | 8           | 9           |             |             |             | Lr     |
| k141_231381_27/9/2017 E | 58703  |             |             |             | 10          |            | 5          | 8          |            | 7           | 9           | 12          | 8           | 9           |             |             |             | Lr     |
| k141_10028_30/8/2017 E  | 58502  | 7           |             |             |             |            |            |            |            | 6           |             | 11          | 8           | 9           |             |             |             | Lr     |
| k141_14864_23/8/2017 S  | 58426  | 7           | 5           |             | 11          |            | 5          | 9          |            | 6           | 9           | 13          | 8           | 9           |             |             |             | Lr     |
| k141_127019_9/8/2017 E  | 58308  | 7           | 5           |             | 11          |            | 5          | 9          |            | 6           | 9           | 13          | 8           | 9           |             |             |             | Lr     |
| k141_156895_9/8/2017 E  | 58298  | 7           |             |             | 10          |            | 5          | 8          |            | 6           | 9           | 11          | 8           | 9           |             |             |             | Lr     |
| k141_3023_23/8/2017 E   | 58269  | 7           | 5           |             | 11          |            | 5          | 9          |            | 6           | 9           | 13          | 8           | 9           |             |             |             | Lr     |
| k141_3035_30/8/2017 E   | 58208  | 7           | 5           |             | 11          |            | 5          | 9          |            | 6           | 9           | 13          | 8           | 9           |             |             |             | Lr     |
| k141_15581_30/8/2017 S  | 58169  | 7           | 5           |             | 11          |            | 5          | 9          |            | 6           | 9           | 13          | 8           | 9           |             |             |             | Lr     |
| k141_117192_27/9/2017 E | 58169  | 7           |             |             |             |            | 5          | 9          |            |             | 9           | 12          | 8           | 9           |             |             |             | Lr     |
| k141_128806_26/7/2017 E | 58155  | 7           | 5           |             | 11          |            | 5          | 9          |            | 6           | 9           | 13          | 8           | 9           |             |             |             | Lr     |
| k141_3739_19/7/2017 E   | 58145  | 7           | 5           |             | 11          |            | 5          | 9          |            | 6           | 9           | 13          | 8           | 9           |             |             |             | Lr     |
| k141_71561_30/8/2017 E  | 57809  |             |             |             |             |            |            | 9          |            | 7           | 9           | 12          | 8           |             |             |             |             | Lr     |
| k141_64752_23/8/2017 E  | 57678  |             |             |             | 10          |            |            | 9          |            | 7           | 9           | 12          | 8           |             |             |             |             | Lr     |
| k141_83188_30/8/2017 S  | 57601  |             |             |             |             |            | 5          | 9          |            |             | 10          | 12          | 8           | 9           |             |             |             | Lr     |
| k141_96267_30/8/2017 S  | 57504  | 7           |             |             |             |            |            |            |            | 6           |             | 11          | 8           | 9           |             |             |             | Lr     |
| k141_47540_9/8/2017 E   | 57411  |             |             |             |             |            | 5          | 9          |            |             | 10          | 12          | 8           | 9           |             |             |             | Lr     |
| k141_48211_23/8/2017 S  | 57411  |             |             |             |             |            | 5          | 9          |            |             | 10          | 12          | 8           | 9           |             |             |             | Lr     |
| k141_61240_30/8/2017 E  | 57411  |             |             |             |             |            | 5          | 9          |            |             | 10          | 12          | 8           | 9           |             |             |             | Lr     |
| k141_232947_19/7/2017 E | 57316  | 7           |             |             |             |            |            |            |            | 6           |             | 11          | 8           | 9           |             |             |             | Lr     |
| k141_44458_23/8/2017 E  | 56615  |             |             |             |             |            | 5          | 8          |            | 6           | 9           | 12          | 8           | 9           |             |             |             | Lr     |
| k141_12450_9/8/2017 E   | 56580  |             |             |             |             |            | 5          | 8          |            | 6           | 9           | 12          | 8           | 9           |             |             |             | Lr     |
| k141_158652_30/8/2017 S | 56566  |             |             |             |             |            | 5          | 8          |            | 6           | 9           | 12          | 8           | 9           |             |             |             | Lr     |
| k141_48231_30/8/2017 S  | 56335  | 7           |             |             | 11          | 4          | 5          | 10         |            | 6           | 9           | 12          | 8           | 10          | 3           |             |             | Lr     |
| k141_63896_26/7/2017 E  | 56172  | 7           |             |             | 11          |            |            |            |            |             |             | 12          |             |             |             |             |             | Lr     |
| k141_222918_2/8/2017 M  | 56164  | 6           |             |             | 11          |            | 5          | 9          |            | 7           | 9           | 12          | 8           | 9           |             |             |             | Lr     |
| k141_12696_2/8/2017 M   | 56125  | 7           |             |             | 10          |            | 5          | 8          |            |             | 9           | 11          | 8           | 9           |             |             |             | Lr     |
| k141_272756_19/7/2017 E | 56008  | 7           | 4           |             | 10          |            | 5          | 8          |            |             | 9           | 11          | 8           | 9           |             |             |             | Lr     |
| k141_23529_2/8/2017 M   | 55503  | 7           |             |             |             |            | 5          | 8          |            | 6           | 9           | 12          | 8           |             |             |             |             | Lr     |
| k141_57056_30/8/2017 S  | 55470  | 7           |             |             | 10          |            | 5          | 8          |            |             | 9           | 11          | 8           | 9           |             |             |             | Lr     |
| k141_124328_26/7/2017 E | 55252  | 7           |             |             | 10          |            |            |            |            | 6           | 9           | 12          |             |             |             |             |             | Lr     |
| k141_121798_30/8/2017 E | 55243  |             |             |             | 10          |            |            | 9          |            | 6           | 9           | 12          | 8           | 9           |             |             |             | Lr     |
| k141_114044_23/8/2017 E | 55227  |             |             |             | 10          |            |            | 9          |            | 6           | 9           | 12          | 8           | 9           |             |             |             | Lr     |
| k141_65569_26/7/2017 E  | 55223  | 7           |             |             | 10          |            |            | 8          |            |             | 9           | 11          | 8           | 9           |             |             |             | Lr     |
| k141_162582_19/7/2017 E | 55132  | 7           |             |             | 10          |            |            | 9          |            |             |             |             | 8           |             |             |             |             | Lr     |
| k141_65133_19/7/2017 E  | 54776  | 7           |             |             | 10          |            |            | 9          |            | 6           | 10          | 12          | 8           |             |             |             |             | Lr     |
| k141_44064_26/7/2017 E  | 54776  | 7           |             |             | 10          |            |            | 9          |            | 6           | 10          | 12          | 8           |             |             |             |             | Lr     |
| k141_58288_23/8/2017 E  | 54770  | 7           |             |             | 10          |            |            | 9          |            | 6           | 10          | 12          | 8           |             |             |             |             | Lr     |
| k141_12273_30/8/2017 E  | 54770  | 7           |             |             | 10          |            |            | 9          |            | 6           | 10          | 12          | 8           |             |             |             |             | Lr     |
| k141_62331_9/8/2017 E   | 54770  | 7           |             |             | 10          |            |            | 9          |            | 6           | 10          | 12          | 8           |             |             |             |             | Lr     |
| k141_32309_30/8/2017 E  | 54756  |             |             |             |             |            |            |            |            |             | 9           | 12          | 8           |             |             |             |             | Lr     |
| k141_55354_30/8/2017 S  | 54701  | 7           |             |             | 10          |            |            | 9          |            | 6           | 10          | 12          | 8           |             |             |             |             | Lr     |
| k141_224974_27/9/2017 E | 54618  |             |             |             |             |            | 5          | 8          |            | 6           | 9           | 12          | 8           | 9           |             |             |             | Lr     |
| k141_70521_19/7/2017 E  | 54570  | 7           |             |             |             |            |            |            |            |             |             |             |             |             |             |             |             | Lr     |
| k141_235448_30/8/2017 S | 54499  |             |             |             |             |            |            |            |            |             |             |             | 8           | 9           |             |             |             | Lr     |
| k141_257873_2/8/2017 M  | 54362  |             |             |             |             |            | 6          | 8          |            | 6           | 9           | 11          |             |             |             |             |             | Lr     |
| k141_158650_27/9/2017 E | 54259  |             |             |             |             |            |            |            |            |             |             |             | 8           | 9           |             |             |             | Lr     |
| k141_204596_23/8/2017 S | 54077  |             |             |             |             |            | 6          |            |            | 6           | 9           | 11          |             |             |             |             |             | Lr     |
| k141_216821_9/8/2017 E  | 53979  | 7           |             |             |             |            |            | 9          |            | 6           | 9           | 12          | 8           | 9           |             |             |             | Lr     |

| Contig                  | Length | 19/7/2017 E | 19/7/2017 S | 19/7/2017 M | 26/7/2017 E | 2/8/2017 E | 2/8/2017 M | 9/8/2017 E | 9/8/2017 M | 23/8/2017 E | 23/8/2017 S | 30/8/2017 E | 30/8/2017 S | 27/9/2017 E | 27/9/2017 S | 4/10/2017 E | 4/10/2017 S | Genome |
|-------------------------|--------|-------------|-------------|-------------|-------------|------------|------------|------------|------------|-------------|-------------|-------------|-------------|-------------|-------------|-------------|-------------|--------|
| k141_120143_30/8/2017 S | 53963  | 7           |             |             |             |            |            | 9          |            | 6           | 9           | 12          | 8           | 9           |             |             |             | Lr     |
| k141_201485_23/8/2017 S | 53007  | 7           |             |             | 10          |            | 5          | 9          |            | 7           | 9           | 12          | 8           | 10          |             |             |             | Lr     |
| k141_130670_19/7/2017 E | 52893  | 6           |             |             | 10          |            |            | 9          |            | 6           | 9           | 12          | 8           |             |             |             |             | Lr     |
| k141_172625_27/9/2017 E | 52239  |             |             |             |             |            |            | 9          |            | 7           | 9           | 12          | 8           | 9           |             |             |             | Lr     |
| k141_3912_23/8/2017 S   | 52053  |             |             |             |             |            |            | 9          |            | 7           | 9           | 12          | 8           | 9           |             |             |             | Lr     |
| k141_35086_26/7/2017 E  | 51581  | 7           | 5           |             | 10          |            | 5          | 9          |            | 6           | 10          | 12          | 9           | 9           |             |             |             | Lr     |
| k141_133349_30/8/2017 S | 51434  |             |             |             |             |            |            | 9          |            | 7           | 9           | 12          | 8           | 9           |             |             |             | Lr     |
| k141_184796_9/8/2017 E  | 51139  |             |             |             |             |            |            | 9          |            | 7           | 9           | 12          | 8           | 9           |             |             |             | Lr     |
| k141_81470_30/8/2017 S  | 50774  |             |             |             |             |            |            | 8          |            | 6           | 9           | 12          | 7           |             |             |             |             | Lr     |
| k141_5242_9/8/2017 E    | 50633  |             |             |             |             |            |            | 8          |            | 6           | 9           | 12          | 7           |             |             |             |             | Lr     |
| k141_62274_30/8/2017 E  | 50624  |             |             |             |             |            |            | 8          |            | 6           | 9           | 12          | 7           |             |             |             |             | Lr     |
| k141_187439_23/8/2017 S | 50573  | 7           |             |             | 11          | 3          | 5          | 9          |            | 7           | 10          | 12          | 8           | 9           |             |             |             | Lr     |
| k141_70335_19/7/2017 E  | 50556  | 7           |             |             | 11          | 3          |            |            |            |             | 10          |             |             |             |             |             |             | Lr     |
| k141_155875_19/7/2017 E | 50436  | 7           |             |             | 11          | 3          | 5          | 8          |            | 6           | 10          | 13          | 8           | 9           | 3           |             |             | Lr     |
| k141_156283_27/9/2017 E | 50383  | 7           |             |             |             |            | 5          | 9          |            | 7           | 10          | 12          | 8           | 9           |             |             |             | Lr     |
| k141_16841_19/7/2017 S  | 50346  | 7           | 5           |             | 10          |            | 5          | 9          |            | 6           | 10          | 12          | 9           | 9           |             |             |             | Lr     |
| k141_64361_30/8/2017 S  | 50227  |             |             |             |             |            |            |            |            | 7           | 9           | 12          | 8           | 9           |             |             |             | Lr     |
|                         |        |             |             |             |             |            |            |            |            |             |             |             |             |             |             |             |             |        |
| k141_111146_23/8/2017 S | 48249  |             |             |             | 10          |            |            |            |            | 7           | 9           | 12          | 8           |             |             |             |             | L.sp   |
| k141_131042_30/8/2017 E | 48249  |             |             |             | 10          |            |            |            |            | 7           | 9           | 12          | 8           |             |             |             |             | L.sp   |
| k141_143908_30/8/2017 S | 48249  |             |             |             | 10          |            |            |            |            | 7           | 9           | 12          | 8           |             |             |             |             | L.sp   |
| k141_159016_23/8/2017 E | 33537  |             | 4           |             | 10          |            |            | 8          |            | 7           | 9           | 12          | 8           | 9           | 3           |             |             | L.sp   |
| k141_81587_19/7/2017 E  | 13496  | 6           |             |             | 6           |            |            |            |            |             |             |             |             | 3           |             |             |             | L.sp   |
| k141_189837_9/8/2017 E  | 13298  |             | 4           |             | 10          |            | 5          | 9          |            | 7           | 9           | 12          | 8           | 9           | 3           |             |             | L.sp   |
| k141_196437_27/9/2017 E | 13298  |             | 4           |             | 10          |            | 5          | 9          |            | 7           | 9           | 12          | 8           | 9           | 3           |             |             | L.sp   |
| k141_182631_26/7/2017 E | 13238  | 6           | 4           |             | 10          | 3          | 5          | 9          |            | 7           | 9           | 12          | 8           | 9           | 3           |             |             | L.sp   |
| k141_214459_2/8/2017 M  | 13164  | 6           | 4           |             | 10          | 3          | 5          | 9          |            | 7           | 9           | 12          | 8           | 9           | 3           |             |             | L.sp   |
| k141_36540_27/9/2017 S  | 12550  | 6           | 4           |             | 10          | 3          | 5          | 9          |            | 7           | 9           | 12          | 8           | 9           | 3           |             |             | L.sp   |

**Table S10.** GTDB genomes with high similarity to assembled contigs. Comparison of MegaHit contigs with GTDB genome/genome assembly sequences by BLASTN. Only matches with at least 90% identity and alignment length  $\geq 10000$  nucleotides were accepted. Column “Found” reports the number of MegaHit contigs matching the indicated genome/genome assembly. Maximal number of hits are observed for the *Lyngbya robusta* (*Limnoraphis robusta* CS-951) genome assembly indicated in yellow.

| Assembly      | Accession No      | Found | Phylum         | Description                                                                                                                                      |
|---------------|-------------------|-------|----------------|--------------------------------------------------------------------------------------------------------------------------------------------------|
| GCA_001437905 | LIBZ01000001.1    | 91    | Actinobacteria | Actinobacteria bacterium BACL4 MAG-120920-bin74 isolate BACL14 MAG-120920-bin74 contig00003.0_to_4_1_120920-bin74, whole genome shotgun sequence |
| GCF_002287885 | NZ_CP016768.2     | 91    | Actinobacteria | Candidatus Nanopelagicus limnes isolate MMS-21-122 chromosome, complete genome                                                                   |
| GCA_001437855 | LIBD01000001.1    | 63    | Actinobacteria | Actinobacteria bacterium BACL4 MAG-120820-bin23 contig00003.1_to_5_120820-bin23, whole genome shotgun sequence                                   |
| GCA_001437755 | LIBF01000001.1    | 29    | Actinobacteria | Actinobacteria bacterium BACL4 MAG-121001-bin59 contig00001.1_to_4_121001-bin59, whole genome shotgun sequence                                   |
| GCF_002284895 | LIBG01000001.1    | 15    | Actinobacteria | Actinobacteria bacterium BACL4 MAG-121022-bin9 contig00003_1_121022-bin9, whole genome shotgun sequence                                          |
| GCF_002288185 | NZ_CP016776.1     | 14    | Actinobacteria | Candidatus Planktophila vernalis isolate MMS-IIA-15 chromosome, complete genome                                                                  |
| GCA_001439225 | LICQ01000001.1    | 13    | Actinobacteria | Actinobacteria bacterium BACL4 MAG-120507-bin0 isolate BACL1 MAG-120507-bin0 contig00003.0_to_3_1_120507-bin0, whole genome shotgun sequence     |
| GCA_000294575 | KB912733.1        | 7     | Actinobacteria | Actinobacterium SCGC AAA027-J17 genomic scaffold A027J17DRAFT_NODE-unique_10_len_38730.10, whole genome shotgun sequence                         |
| GCA_001439025 | LIAT01000001.1    | 5     | Actinobacteria | Actinobacteria bacterium BACL2 MAG-120813-bin23 contig00047_1_120813-bin23, whole genome shotgun sequence                                        |
|               | AJWB01000001.1    | 2     | Actinobacteria | Actinobacterium SCGC AAA027-L06 A27L6_contig00009, whole genome shotgun sequence                                                                 |
| GCA_000383815 | NZ_CP015605.1     | 1     | Actinobacteria | Actinobacteria bacterium IMCC19121 chromosome, complete genome                                                                                   |
| GCF_002288305 | NZ_CP016779.1     | 1     | Actinobacteria | Candidatus Nanopelagicus abundans isolate MMS-IIB-91 chromosome, complete genome                                                                 |
| GCA_002366845 | DFCA01000027.1    | 1     | Actinobacteria | TPA_asm: Actinobacteria bacterium UBA3066 UBA3066_contig_1007, whole genome shotgun sequence                                                     |
| GCF_000020465 | NC_010803.1       | 111   | Bacteroidota   | Chlorobium limicola DSM 245, complete genome                                                                                                     |
| GCA_002293105 | DBCP01000117.1    | 63    | Bacteroidota   | TPA_asm: Bacteroidetes bacterium UBA955 UBA955_contig_102032, whole genome shotgun sequence                                                      |
| GCF_001747405 | NZ_CP017305.1     | 54    | Bacteroidota   | Chlorobaculum limnaeum strain DSM 1677, complete genome                                                                                          |
| GCA_002293045 | DBCM01000162.1    | 18    | Bacteroidota   | TPA_asm: Flavobacteriales bacterium UBA958 UBA958_contig_10488, whole genome shotgun sequence                                                    |
| GCF_001509575 | NZ_LMBR01000001.1 | 5     | Bacteroidota   | Chlorobium limicola strain Frasassi contig-124_0, whole genome shotgun sequence                                                                  |
| GCF_000015125 | NC_008639.1       | 1     | Bacteroidota   | Chlorobium phaeobacteroides DSM 266, complete genome                                                                                             |
| GCF_000972705 | NZ_LATL02000001.1 | 538   | Cyanobacteria  | Limnoraphis robusta CS-951 contig001, whole genome shotgun sequence                                                                              |
| GCF_000169095 | NZ_AAVU01000110.1 | 10    | Cyanobacteria  | Lyngbya sp. PCC 8106 1099428180450, whole genome shotgun sequence                                                                                |
| GCA_000179235 | NZ_ADXL01000094.1 | 1     | Cyanobacteria  | Synechococcus sp. CB0101 contig08714, whole genome shotgun sequence                                                                              |
| GCF_002252705 | NZ_NQLA01000001.1 | 1     | Cyanobacteria  | Vulcanococcus limneticus LL NODE_10_length_226416_cov_7.02386, whole genome shotgun sequence                                                     |
| GCF_002688585 | NZ_CP024034.1     | 230   | Proteobacteria | Candidatus Fonsibacter ubiquis isolate LSUCC0530 chromosome, complete genome                                                                     |
| GCF_000981505 | NZ_LN827929.1     | 82    | Proteobacteria | Candidatus Methylopusillus planktonicus genome assembly Candidatus Methylopusillus planktonicus MMS-2-53, chromosome : 1                         |



|               |                |    |                   |                                                                                                                     |
|---------------|----------------|----|-------------------|---------------------------------------------------------------------------------------------------------------------|
| GCA_002293155 | DBCQ01000071.1 | 22 | Proteobacteria    | TPA_asm: Burkholderiales bacterium UBA954<br>UBA954_contig_1001, whole genome shotgun sequence                      |
| GCA_002359975 | DENG01000111.1 | 21 | Proteobacteria    | TPA_asm: Polynucleobacter sp. UBA2650<br>UBA2650_contig_10029, whole genome shotgun sequence                        |
| GCA_002342245 | DDPQ01000118.1 | 13 | Proteobacteria    | TPA_asm: Polynucleobacter sp. UBA2464<br>UBA2464_contig_1015, whole genome shotgun sequence                         |
|               | AQUG01000001.1 | 12 | Proteobacteria    | Alpha proteobacterium SCGC AAA027-L15<br>A27L15DRAFT_NODE-unique_1_len_245217.1_C, whole<br>genome shotgun sequence |
| GCA_000371825 | AQUF01000001.1 | 9  | Proteobacteria    | Alpha proteobacterium SCGC AAA027-J10<br>A27J10DRAFT_NODE-unique_1_len_96767.1_C, whole genome<br>shotgun sequence  |
| GCA_002292975 | DBCIO1000012.1 | 7  | Proteobacteria    | TPA_asm: Polynucleobacter sp. UBA962<br>UBA962_contig_100857, whole genome shotgun sequence                         |
| GCA_000364545 | AQPD01000001.1 | 5  | Proteobacteria    | Alpha proteobacterium SCGC AAA027-C06 YUCDRAFT_NODE-<br>unique_1_len_70157.1_C, whole genome shotgun sequence       |
| GCA_000419465 | ATTB01000001.1 | 3  | Proteobacteria    | Alpha proteobacterium SCGC AAA028-C07 A28C7DRAFT_NODE-<br>unique_1_len_203146.1_C, whole genome shotgun sequence    |
| GCA_002292945 | BCG01000126.1  | 2  | Proteobacteria    | TPA_asm: Proteobacteria bacterium UBA964<br>UBA964_contig_10071, whole genome shotgun sequence                      |
| GCA_000371845 | AQUE01000001.1 | 1  | Proteobacteria    | Alpha proteobacterium SCGC AAA280-P20<br>A280P20DRAFT_NODE-unique_1_len_90870.1_C, whole<br>genome shotgun sequence |
| GCA_002304425 | NEUY01000001.1 | 29 | Verrucomicrobiota | Opitutae bacterium Tous-C10FEB Opitutae-Tous-C10FEB-C1,<br>whole genome shotgun sequence                            |
| GCA_002304435 | NEUZ01000001.1 | 1  | Verrucomicrobiota | Opitutae bacterium Tous-C8FEB Opitutae-Tous-C8FEB-C1,<br>whole genome shotgun sequence                              |

**Table S11.** Comparison of the *Lyngbya robusta* genome assembly (GCF\_000972705) with MegaHit contigs obtained from reads assigned to *Lyngbya robusta* by Kraken2. Only the longest matches are reported. “Lyngbya contig” indicates the assembled MegaHit contigs. Contig “start” and “end” position of match within the contig.

| GCF_000972705.2 |         |                |                       |                  |                 |        |              |            |
|-----------------|---------|----------------|-----------------------|------------------|-----------------|--------|--------------|------------|
| Start           | End     | Lyngbya contig | Lyngbya contig length | Percent identity | Length of match | Strand | Contig start | Contig end |
| 4119641         | 4142905 | k141_980       | 27750                 | 97.993           | 23271           | rc     | 1799         | 25064      |
| 1358642         | 1378938 | k141_2289      | 38169                 | 95.433           | 20342           |        | 17849        | 38169      |
| 6768428         | 6786921 | k141_295       | 21804                 | 95.834           | 18580           | rc     | 3001         | 21536      |
| 792193          | 810338  | k141_634       | 38567                 | 98.529           | 18147           | rc     | 9806         | 27949      |
| 2169978         | 2187390 | k141_1232      | 18197                 | 97.986           | 17425           | rc     | 408          | 17811      |
| 2496809         | 2513832 | k141_315       | 23145                 | 95.814           | 17034           | rc     | 105          | 17126      |
| 6791330         | 6807977 | k141_912       | 25825                 | 97.628           | 16651           | rc     | 9178         | 25825      |
| 819640          | 836066  | k141_1533      | 17896                 | 97.675           | 16428           |        | 494          | 16904      |
| 3628652         | 3644990 | k141_651       | 20331                 | 97.663           | 16349           | rc     | 3189         | 19513      |
| 1639850         | 1655676 | k141_1730      | 26891                 | 97.044           | 15832           | rc     | 5194         | 20996      |
| 5328288         | 5343867 | k141_2121      | 56377                 | 97.242           | 15626           | rc     | 7133         | 22720      |
| 7288059         | 7303475 | k141_535       | 18938                 | 98.425           | 15425           | rc     | 3047         | 18434      |
| 1288464         | 1303353 | k141_1104      | 78260                 | 97.422           | 14896           | rc     | 26701        | 41589      |
| 4494531         | 4509326 | k141_507       | 25679                 | 97.444           | 14827           | rc     | 1            | 14825      |
| 3205431         | 3220117 | k141_1665      | 15224                 | 96.411           | 14739           |        | 1            | 14695      |
| 981482          | 995486  | k141_1323      | 35836                 | 97.802           | 14012           |        | 14883        | 28869      |
| 5364767         | 5378652 | k141_1564      | 25626                 | 98.057           | 13896           |        | 9502         | 23397      |
| 3367654         | 3381249 | k141_903       | 38949                 | 97.662           | 13599           | rc     | 24821        | 38417      |
| 4750107         | 4763663 | k141_1316      | 14531                 | 98.326           | 13557           | rc     | 3            | 13559      |
| 2112310         | 2125858 | k141_2179      | 20996                 | 98.207           | 13549           |        | 541          | 14088      |
| 7125777         | 7139311 | k141_2091      | 33929                 | 97.407           | 13537           | rc     | 20400        | 33929      |
| 1729460         | 1742842 | k141_1307      | 22670                 | 96.684           | 13389           | rc     | 851          | 14216      |
| 7192111         | 7205433 | k141_676       | 22672                 | 97.269           | 13328           | rc     | 598          | 13921      |
| 205490          | 218618  | k141_1255      | 23817                 | 95.382           | 13145           |        | 10190        | 23316      |
| 2599589         | 2612524 | k141_251       | 23718                 | 95.499           | 12974           |        | 564          | 13525      |
| 6215611         | 6228403 | k141_676       | 22672                 | 97.21            | 12797           | rc     | 1129         | 13921      |
| 5566682         | 5579012 | k141_27        | 20312                 | 95.939           | 12361           | rc     | 7619         | 19957      |
| 648250          | 660301  | k141_1540      | 24539                 | 97.986           | 12064           |        | 558          | 12620      |
| 2348863         | 2360673 | k141_2113      | 42131                 | 97.825           | 11818           | rc     | 28107        | 39911      |
| 327504          | 339303  | k141_136       | 20903                 | 97.204           | 11802           | rc     | 8447         | 20245      |
| 5440477         | 5452208 | k141_1668      | 21470                 | 97.888           | 11743           | rc     | 4175         | 15909      |
| 4421016         | 4432703 | k141_1220      | 33116                 | 98.349           | 11689           | rc     | 8912         | 20600      |
| 375821          | 387324  | k141_253       | 45713                 | 98.063           | 11510           |        | 8336         | 19844      |
| 5944158         | 5955625 | k141_252       | 17068                 | 97.821           | 11473           |        | 4629         | 16100      |
| 2741860         | 2753286 | k141_2121      | 56377                 | 97.149           | 11434           | rc     | 44944        | 56345      |
| 1857993         | 1869354 | k141_892       | 33603                 | 94.455           | 11379           |        | 21695        | 33040      |
| 1594163         | 1605502 | k141_1328      | 20347                 | 97.276           | 11344           | rc     | 602          | 11944      |
| 5122685         | 5133875 | k141_266       | 29642                 | 98.186           | 11192           | rc     | 568          | 11758      |
| 1475989         | 1487095 | k141_2089      | 15478                 | 97.705           | 11109           | rc     | 2656         | 13762      |
| 1251182         | 1262172 | k141_753       | 16050                 | 97.137           | 11004           |        | 139          | 11119      |
| 5104784         | 5115741 | k141_266       | 29642                 | 97.919           | 10958           | rc     | 18262        | 29219      |
| 2541511         | 2552377 | k141_351       | 15874                 | 98.04            | 10869           |        | 5008         | 15874      |
| 1111252         | 1122059 | k141_2328      | 14315                 | 97.761           | 10808           | rc     | 599          | 11373      |
| 5874756         | 5885532 | k141_775       | 25133                 | 96.92            | 10778           |        | 14316        | 25091      |
| 2226652         | 2237389 | k141_555       | 13802                 | 93.721           | 10750           |        | 1531         | 12268      |
| 2588961         | 2599546 | k141_1769      | 45432                 | 98.074           | 10594           |        | 34409        | 45000      |
| 5841419         | 5851863 | k141_2131      | 12749                 | 97.674           | 10447           | rc     | 2325         | 12749      |
| 1886200         | 1896598 | k141_1229      | 22942                 | 98.01            | 10401           | rc     | 9928         | 20322      |
| 5043419         | 5053766 | k141_458       | 11267                 | 94.275           | 10375           |        | 726          | 11037      |
| 6608292         | 6618639 | k141_2358      | 10757                 | 97.459           | 10352           | rc     | 1            | 10347      |

**Table S12.** Summary of results obtained for the MetaBat2 bins using virsorter2 (phage content) and annotation of bins by GTDBtk for the 2017 samples. Only bins with an estimated relative abundance (median MetaBat2 depth value across all contigs within a bin) greater than 5 in the indicated sample (the sample/date used to sort the table) are shown. Values in all samples higher than 5 are shaded grey. Taxonomies identified by GTDBtk are reported at the phylum and genus/species level. The complete list of values including results from checkm are available in Online resource 2 (file vareselake\_2.xlsx).

| MetaBat2 |                 | MetaBat2    |             |            |            |             |             |             |             | Virsorter | GTDBtk                                                                                                                                                                                                                             |
|----------|-----------------|-------------|-------------|------------|------------|-------------|-------------|-------------|-------------|-----------|------------------------------------------------------------------------------------------------------------------------------------------------------------------------------------------------------------------------------------|
| bin      | Total contiglen | 19/7/2017 E | 26/7/2017 E | 2/8/2017 E | 9/8/2017 E | 23/8/2017 E | 30/8/2017 E | 27/9/2017 E | 4/10/2017 E |           | Classification                                                                                                                                                                                                                     |
| bin.1    | 268194          | 0.2         | 1.2         | 29.7       | 30.9       | 55.5        | 24.0        | 17.4        | 12.6        | phage     | Verrucomicrobiota QYQL01 sp007280915<br>Cyanobacteria Lyngbya robusta<br>Firmicutes UBA970 sp002292805<br>Proteobacteria Fonsibacter ubiqius<br>Proteobacteria Polynucleobacter sp002359975<br><br>Bacteroidota SYHX01 sp005799025 |
| bin.100  | 3311991         | 2.3         | 4.7         | 1.6        | 20.9       | 5.3         | 7.6         | 6.9         | 1.3         | phage     |                                                                                                                                                                                                                                    |
| bin.101  | 6644546         | 18.4        | 21.9        | 8.1        | 20.7       | 12.2        | 30.3        | 24.3        | 5.7         |           |                                                                                                                                                                                                                                    |
| bin.102  | 356020          | 15.3        | 18.5        | 6.8        | 19.8       | 10.8        | 27.5        | 21.5        | 4.8         |           |                                                                                                                                                                                                                                    |
| bin.104  | 212566          | 18.8        | 10.3        | 8.6        | 19.2       | 9.1         | 15.7        | 12.8        | 4.6         |           |                                                                                                                                                                                                                                    |
| bin.103  | 595305          | 17.9        | 8.3         | 8.4        | 18.9       | 7.7         | 10.9        | 9.8         | 4.1         |           |                                                                                                                                                                                                                                    |
| bin.105  | 925085          | 11.3        | 6.2         | 6.1        | 17.5       | 5.9         | 8.5         | 7.8         | 2.8         |           |                                                                                                                                                                                                                                    |
| bin.106  | 531269          | 7.0         | 5.4         | 2.5        | 15.9       | 6.1         | 7.5         | 6.7         | 2.0         |           |                                                                                                                                                                                                                                    |
| bin.107  | 353399          | 6.7         | 5.4         | 2.6        | 15.6       | 6.1         | 7.4         | 6.8         | 2.2         | phage     |                                                                                                                                                                                                                                    |
| bin.108  | 233535          | 6.9         | 5.3         | 3.0        | 14.8       | 6.0         | 7.2         | 6.8         | 2.3         | phage     |                                                                                                                                                                                                                                    |
| bin.109  | 280254          | 6.7         | 5.2         | 2.9        | 14.6       | 5.9         | 7.2         | 6.7         | 2.3         | phage     |                                                                                                                                                                                                                                    |
| bin.11   | 358425          | 5.9         | 4.9         | 2.3        | 13.1       | 5.7         | 6.8         | 6.5         | 2.7         |           |                                                                                                                                                                                                                                    |
| bin.10   | 246752          | 2.9         | 2.1         | 5.5        | 4.6        | 6.3         | 3.9         | 3.5         | 2.0         | phage     |                                                                                                                                                                                                                                    |

| MetaBat2 |                 | MetaBat2    |             |             |             |              |             |            |            | Virsorter | GTDBtk                                                                                  |
|----------|-----------------|-------------|-------------|-------------|-------------|--------------|-------------|------------|------------|-----------|-----------------------------------------------------------------------------------------|
| Bin      | Total contiglen | 19_7_2017_S | 23_8_2017_S | 30_8_2017_S | 27_9_2017_S | 04_10_2017_S | 19_7_2017_M | 2_8_2017_M | 9_8_2017_M |           | Classification                                                                          |
| bin.198  | 786300          | 15.7        | 31.4        | 32.8        | 14.4        | 3.1          | 0.5         | 3.2        | 1.0        |           | Proteobacteria Fonsibacter ubiqius                                                      |
| bin.248  | 292759          | 6.1         | 30.7        | 29.8        | 8.6         | 2.8          | 0.2         | 1.4        | 0.4        | phage     | Actinobacteriota MAG-120802 sp003569145                                                 |
| bin.61   | 362208          | 4.3         | 8.9         | 20.9        | 4.3         | 0.7          | 0.1         | 1.2        | 0.3        |           |                                                                                         |
| bin.56   | 235684          | 1.7         | 27.1        | 20.2        | 2.7         | 0.7          | 0.1         | 0.5        | 0.2        |           | Cyanobacteria Lyngbya robusta                                                           |
| bin.15   | 213414          | 0.3         | 7.0         | 19.5        | 6.8         | 1.0          | 0.0         | 0.1        | 0.0        | phage     |                                                                                         |
| bin.155  | 6696240         | 7.1         | 16.4        | 15.8        | 7.1         | 5.3          | 1.8         | 11.4       | 5.5        |           | Verrucomicrobiota IMCC26134 sp002382525                                                 |
| bin.205  | 234738          | 0.2         | 17.1        | 15.5        | 4.4         | 1.4          | 0.1         | 0.1        | 0.2        | phage     |                                                                                         |
| bin.266  | 2822690         | 2.6         | 11.6        | 12.3        | 0.5         | 0.1          | 0.1         | 1.5        | 0.3        |           | Actinobacteriota Nanopelagicus sp001437855                                              |
| bin.247  | 575798          | 4.0         | 22.7        | 11.1        | 1.2         | 0.3          | 0.0         | 0.9        | 0.3        | phage     |                                                                                         |
| bin.60   | 838560          | 17.5        | 8.9         | 10.6        | 7.5         | 1.3          | 0.5         | 4.1        | 0.7        |           | Verrucomicrobiota QYQL01 sp007280915                                                    |
| bin.255  | 313612          | 6.1         | 13.1        | 10.1        | 5.4         | 1.7          | 0.1         | 0.9        | 0.2        | phage     |                                                                                         |
| bin.69   | 1196598         | 0.6         | 4.0         | 8.4         | 1.1         | 0.1          | 0.0         | 0.2        | 0.1        |           | Actinobacteriota Planktophila sp001438925<br>Bacteroidota JJ008 sp005791465             |
| bin.195  | 251641          | 6.5         | 13.2        | 7.4         | 1.3         | 0.4          | 0.2         | 0.9        | 0.3        | phage     |                                                                                         |
| bin.233  | 228992          | 0.7         | 6.8         | 7.3         | 1.2         | 0.3          | 0.0         | 0.2        | 0.2        | phage     | Proteobacteria Methylopumilus universalis<br>Actinobacteriota Nanopelagicus sp003569185 |
| bin.88   | 3283112         | 1.5         | 4.3         | 7.2         | 2.8         | 1.5          | 1.9         | 2.3        | 3.9        |           |                                                                                         |
| bin.127  | 211018          | 7.0         | 7.8         | 6.7         | 1.8         | 1.0          | 0.3         | 3.1        | 0.4        | phage     | Proteobacteria Fonsibacter sp000371825                                                  |
| bin.8    | 310876          | 15.2        | 4.7         | 6.6         | 5.6         | 1.2          | 1.0         | 4.9        | 0.9        |           |                                                                                         |
| bin.237  | 1722446         | 17.3        | 5.8         | 6.6         | 0.3         | 0.1          | 0.3         | 0.9        | 0.3        |           |                                                                                         |
| bin.147  | 803712          | 4.1         | 3.6         | 6.6         | 7.8         | 0.8          | 0.6         | 2.6        | 0.6        |           |                                                                                         |
| bin.73   | 702378          | 8.4         | 4.4         | 6.5         | 9.6         | 7.8          | 4.6         | 8.8        | 4.4        |           |                                                                                         |
| bin.92   | 554580          | 0.7         | 1.7         | 6.1         | 3.3         | 0.7          | 0.3         | 0.8        | 0.3        |           |                                                                                         |
| bin.150  | 426586          | 11.5        | 6.4         | 6.1         | 3.5         | 5.6          | 4.0         | 6.6        | 3.1        |           |                                                                                         |
| bin.31   | 538998          | 1.3         | 12.1        | 5.8         | 1.3         | 0.3          | 0.0         | 0.2        | 0.1        | phage     |                                                                                         |
| bin.125  | 352369          | 10.1        | 13.7        | 5.6         | 1.1         | 0.3          | 0.1         | 2.2        | 0.4        | phage     |                                                                                         |
| bin.39   | 298041          | 9.1         | 7.0         | 5.6         | 1.3         | 0.7          | 0.2         | 1.9        | 0.3        | phage     |                                                                                         |

**Table S13.** Summary of results obtained for the MetaBat2 bins using virsorter2 (phage content) and annotation of bins by GTDBtk for the 2016 samples. Only bins with an estimated relative abundance (median MetaBat2 depth value across all contigs within a bin) greater than 5 in the indicated sample (the sample/date used to sort the table) are shown. Values in all samples higher than 5 are shaded grey. Taxonomies identified by GTDBtk are reported at the phylum and genus/species level. The complete list of values including results from checkm are available in Online resource 2 (file vareselake\_2.xlsx).

| MetaBat2 |                 |             |            |             |             | GTDBtk    |                                             |
|----------|-----------------|-------------|------------|-------------|-------------|-----------|---------------------------------------------|
| Bin      | Total contiglen | 31/8/2016 E | 7/9/2016 E | 14/9/2016 E | 21/9/2016 E | Virsorter | Classification                              |
| bin.28   | 224055          | 3.18        | 13.05      | 17.86       | 26.68       | phage     |                                             |
| bin.10   | 845049          | 4.65        | 8.4        | 6.37        | 14.46       |           | Actinobacteriota Nanopelagicus sp001437855  |
| bin.52   | 1221917         | 2.71        | 5.72       | 6.14        | 10.88       |           | Proteobacteria Fonsibacter ubiquis          |
| bin.23   | 265008          | 4.58        | 6.31       | 4.2         | 8.97        | phage     |                                             |
| bin.36   | 671716          | 3.8         | 6.58       | 4.47        | 8.59        |           | Actinobacteriota Nanopelagicus sp003569185  |
| bin.19   | 543265          | 5.4         | 6.28       | 3.56        | 8.09        | phage     |                                             |
| bin.60   | 304840          | 0.58        | 2.16       | 7.44        | 7.38        | phage     |                                             |
| bin.12   | 1042573         | 2.17        | 7.05       | 3.97        | 7.29        | phage     |                                             |
| bin.31   | 3920867         | 1.44        | 3.7        | 5.08        | 6.37        | phage     |                                             |
| bin.63   | 4515768         | 1.57        | 4.94       | 3.86        | 6.17        | phage     |                                             |
| bin.71   | 238065          | 2.55        | 4.53       | 2.41        | 5.89        |           |                                             |
| bin.46   | 297689          | 1.91        | 3.32       | 2.75        | 5.35        |           |                                             |
| bin.72   | 1596733         | 2.81        | 3.51       | 1.87        | 5.35        |           | Proteobacteria Polynucleobacter sp002359975 |

| MetaBat2 |                 |            |             |             |             | GTDBtk    |                                    |
|----------|-----------------|------------|-------------|-------------|-------------|-----------|------------------------------------|
| Bin      | Total contiglen | 7/9/2016 S | 14/9/2016 S | 21/9/2016 S | 31/8/2016 M | Virsorter | Classification                     |
| bin.49   | 2720869         | 2.74       | 56.56       | 52.65       | 1.97        |           | Cyanobacteria Synechococcus_D      |
| bin.48   | 3431136         | 0.53       | 24.6        | 0.02        | 0.01        |           | Bdellovibrionota Silvanigrellaceae |
| bin.3    | 386814          | 0.15       | 13.82       | 0.68        | 0.31        |           |                                    |
| bin.43   | 322609          | 0.2        | 10.37       | 0.7         | 4.39        | phage     |                                    |
| bin.5    | 318630          | 3.44       | 7.15        | 6.11        | 0.05        | phage     |                                    |
| bin.47   | 396409          | 8.82       | 7.11        | 22.86       | 12.33       |           |                                    |
| bin.57   | 204091          | 1.79       | 5.44        | 7.3         | 0.22        |           |                                    |
| bin.58   | 4476435         | 6.24       | 5.23        | 4.17        | 0.26        |           | Cyanobacteri Snowella              |

**Table S14.** Conservation of nitrogenase and nitrogen-fixing genes from *Lyngbya robusta* in the MetaBat2 bin assigned to *Lyngbya robusta*. Percent sequence identity and match length values shown were obtained with DIAMOND (blastx option) comparing the contigs in the MetaBat2 bin against the *Lyngbya robusta* proteome as defined in NZ\_LATL02000057.1.

| NZ_LATL02000154.1<br>Lyngbya robusta genome |         |        |                |      |             | MetaBat2 bin<br>assigned to Lyngbya robusta                    |                     |                   |
|---------------------------------------------|---------|--------|----------------|------|-------------|----------------------------------------------------------------|---------------------|-------------------|
| Start pos                                   | End pos | strand | NCBI Accession | Gene | Length (aa) | Description                                                    | % sequence identity | Match length (aa) |
| 3858                                        | 4058    | -      | WP_046280725.1 | nifT | 67          | putative nitrogen fixation protein NifT                        | 97                  | 66                |
| 4220                                        | 4486    | -      | WP_046280720.1 |      | 89          | nitrogen fixation protein NifZ                                 | 98.9                | 88                |
| 4473                                        | 5606    | -      | WP_046280726.1 | nifV | 378         | homocitrate synthase                                           | 99.7                | 377               |
| 5888                                        | 6100    | -      | WP_046280727.1 |      | 71          | DUF2949 domain-containing protein                              | 100                 | 70                |
| 6850                                        | 7146    | -      | WP_046280721.1 |      | 99          | hypothetical protein                                           | 100                 | 98                |
| 7208                                        | 7939    | -      | WP_046280722.1 | cysE | 244         | serine O-acetyltransferase                                     | 100                 | 174               |
| 9259                                        | 10719   | +      | WP_046280723.1 | nifB | 487         | nitrogenase cofactor biosynthesis protein NifB                 | 99.4                | 487               |
| 11042                                       | 12244   | +      | WP_046280728.1 | nifS | 401         | cysteine desulfurase NifS                                      | 99.3                | 400               |
| 12454                                       | 13350   | +      | WP_046276697.1 | nifU | 299         | Fe-S cluster assembly protein NifU                             | 97.7                | 298               |
| 13959                                       | 14861   | +      | WP_046276698.1 | nifH | 301         | nitrogenase iron protein                                       | 98                  | 300               |
| 14986                                       | 16434   | +      | WP_046276713.1 | nifD | 483         | nitrogenase molybdenum-iron protein alpha chain                | 96.7                | 482               |
| 16659                                       | 18197   | +      | WP_200906277.1 | nifK | 513         | nitrogenase molybdenum-iron protein subunit beta               | 96.9                | 511               |
| 18365                                       | 18691   | +      | WP_046276700.1 |      | 109         | Mo-dependent nitrogenase C-terminal domain-containing protein  | 100                 | 108               |
| 18740                                       | 20161   | +      | WP_046276701.1 | nifE | 474         | nitrogenase iron-molybdenum cofactor biosynthesis protein NifE | 98.7                | 473               |
| 20263                                       | 21618   | +      | WP_046276702.1 | nifN | 452         | nitrogenase iron-molybdenum cofactor biosynthesis protein NifN | 99.6                | 451               |
| 21779                                       | 22264   | +      | WP_046276703.1 |      | 162         | DUF269 domain-containing protein                               | 96.3                | 161               |
| 22277                                       | 22687   | +      | WP_049559465.1 | nifX | 137         | nitrogen fixation protein NifX                                 | 94.2                | 137               |
| 22820                                       | 23299   | +      | WP_082172436.1 |      | 160         | NifX-associated nitrogen fixation protein                      | 100                 | 159               |
| 23374                                       | 23607   | +      | WP_046276705.1 |      | 78          | hypothetical protein                                           | 100                 | 77                |
| 23604                                       | 23942   | +      | WP_046276706.1 | nifW | 113         | nitrogenase-stabilizing/protective protein NifW                | 93.8                | 112               |

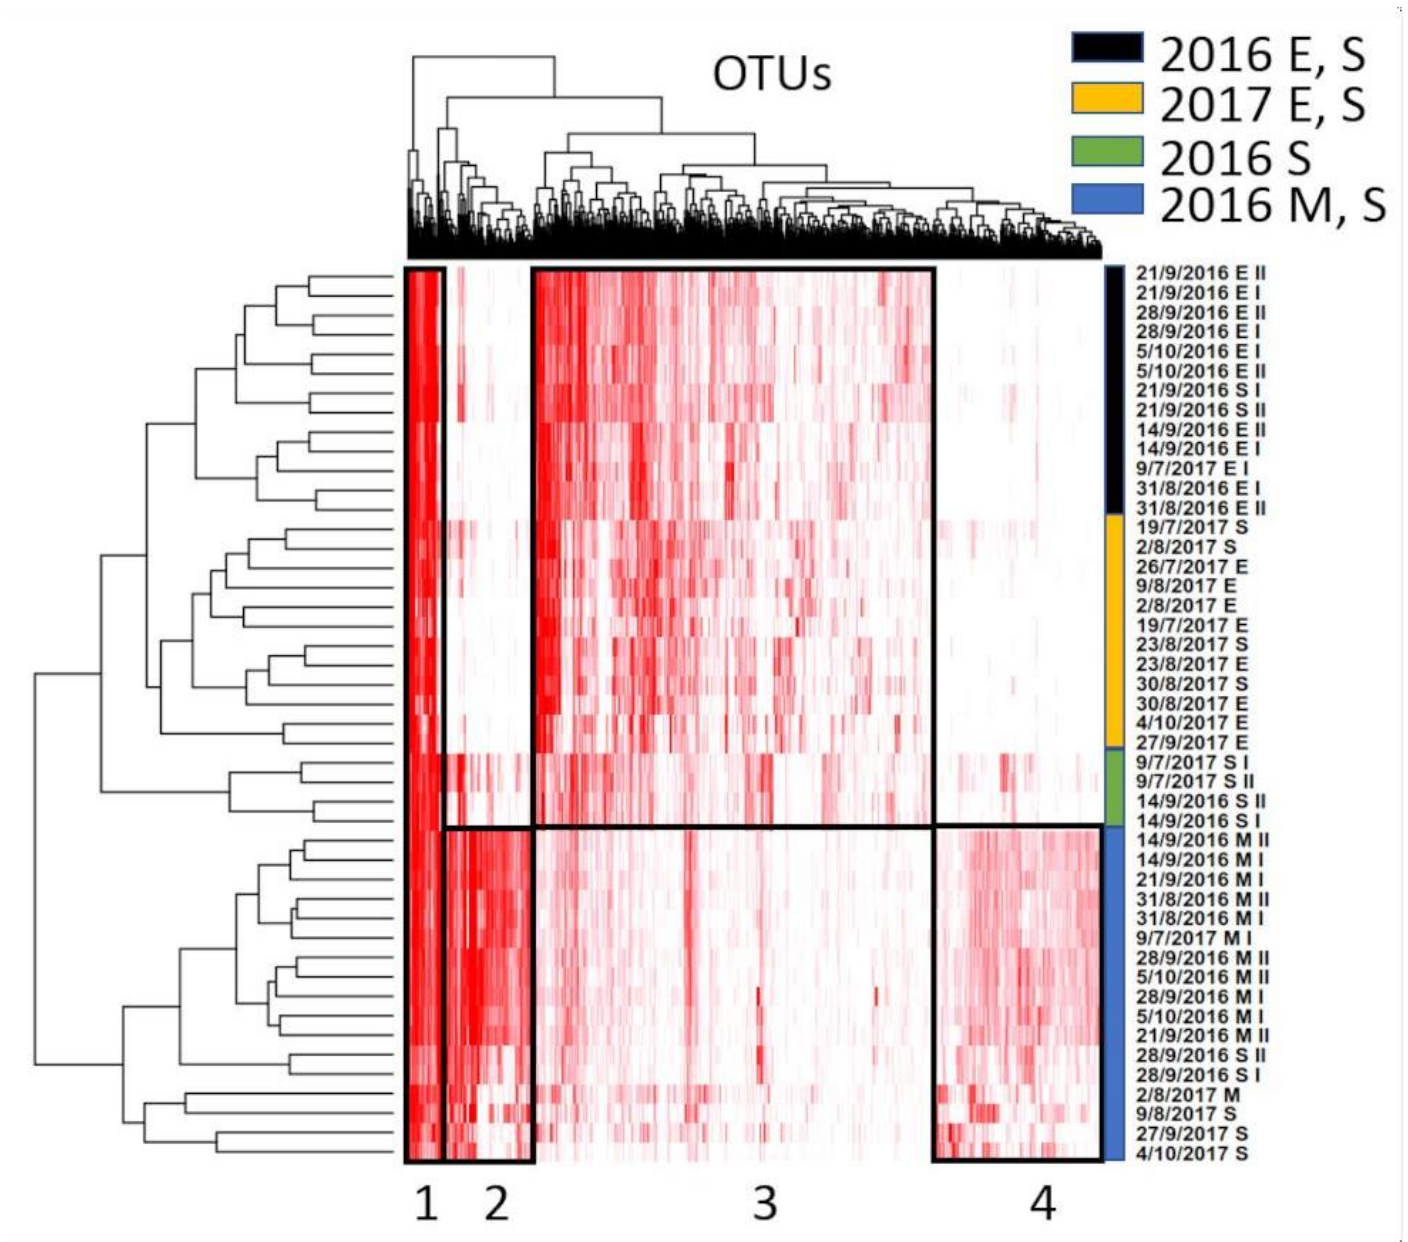

**Fig. S1.** Operational taxonomy units (OTUs) clustering of 16S samples. Only OTUs with total abundance higher than 100 across all samples were included. Values shown are log<sub>2</sub> of OTU abundance (OTU abundances of zero were set 1). E = Epi, S = 2.5x Secchi, M = Meso. Four large clusters are indicated by numbers on the bottom. I and II are duplicates of the same sample

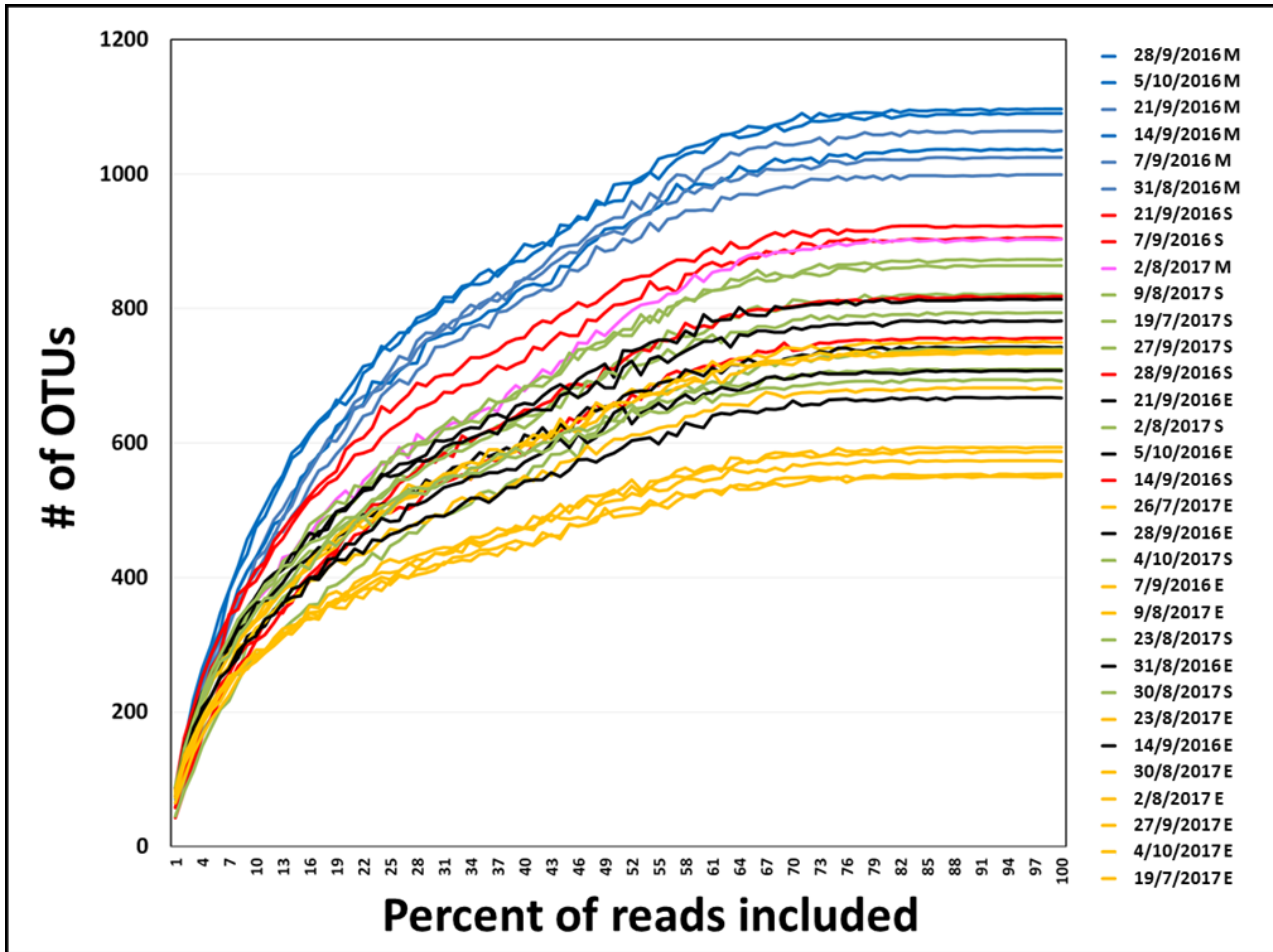

**Fig. S2.** Rarefaction curve analysis of operational taxonomy units (OTUs). Samples names shown on the right are ordered from top to bottom according to the maximum number of OTUs present. Colour code is yellow (2017 Epi - E), black (2016 E), red (2016 2.5x Secchi - S), green (2017 S), magenta (2017 Meso - M), blue (2016 M). 100% on the horizontal axis corresponds to 22,000 rarefied amplicon sequences

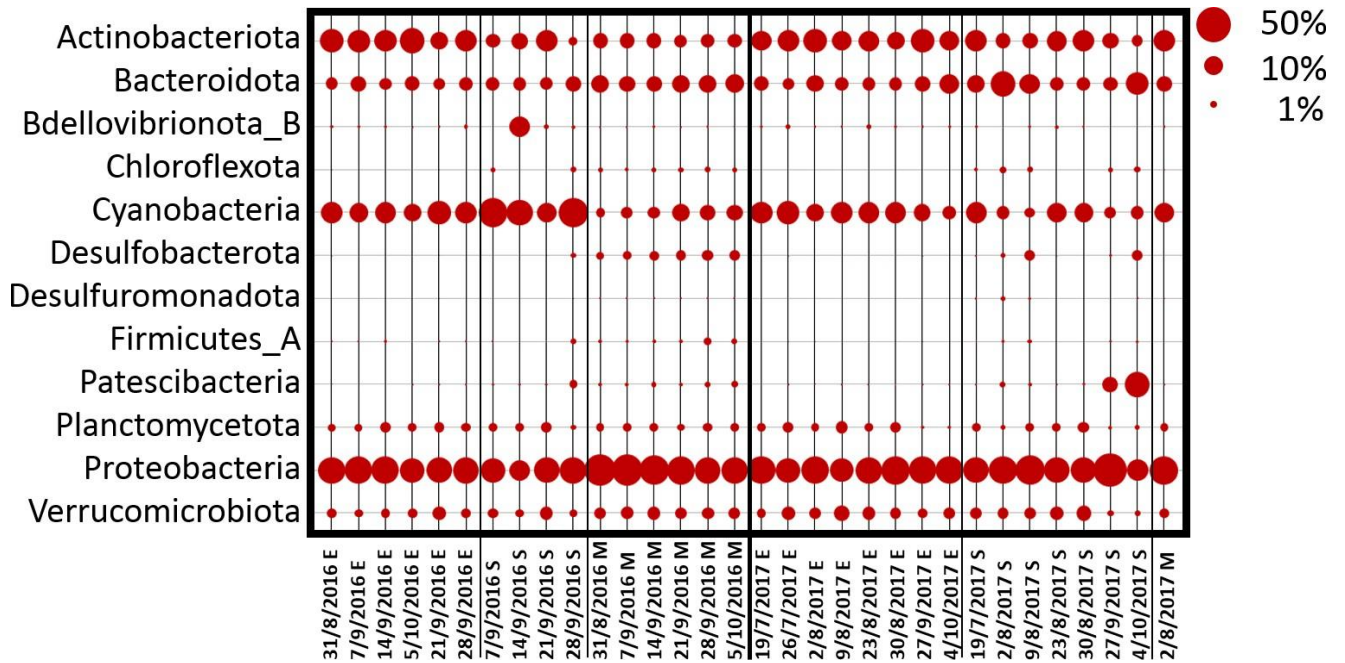

**Fig. S3.** Composition of the microbial community at the phylum level as determined from 16S data. The community composition is shown for all the water samples collected during the sampling period in Lake Varese at the three different depths (Epi - E - 0.5 m; 2.5x Secchi - S - and Meso - M - 13 m). Samples were sequenced for 16S rRNA (V3-V4 region) and analysed at the phylum level. Secchi depths were measured at each site using a Secchi disk and values were multiplied by 2.5. The M depth corresponded to the S depth on 31/8/2016 and 5/10/2016. Results are expressed as percent of all 16S amplicons. For 2016 replicate samples, the average value is shown. Only phyla observed with higher than 1% abundance are shown. Circles shown represent percent values within the fraction of taxonomy assigned shotgun sequences (circles shown at the top right of the figure represent example percent values)



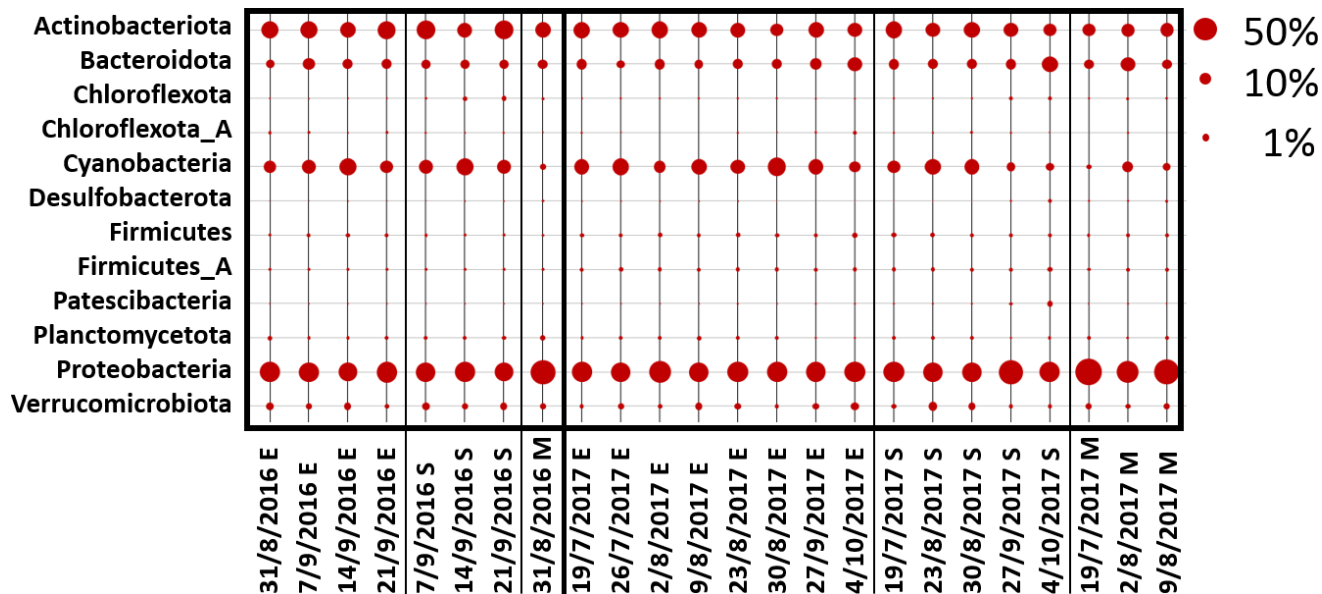

**Fig. S4.** Community composition at the phylum level as determined from the shotgun data. The community composition is shown for all the water samples collected during the sampling period in Lake Varese at the three different depths (Epi - E - 0.5 m; 2.5x Secchi - S - and Meso - M - 13 m). Samples were analysed for shotgun sequencing. The figure shows variations in the microbial community at the phylum level. Secchi depths were measured at each site using a Secchi disk and values multiplied by 2.5. The M depth corresponded to the S depth on 31/8/2016. Circles shown represent percent values within the fraction of taxonomy assigned shotgun sequences (circles shown at the top right of the figure represent example percent values)

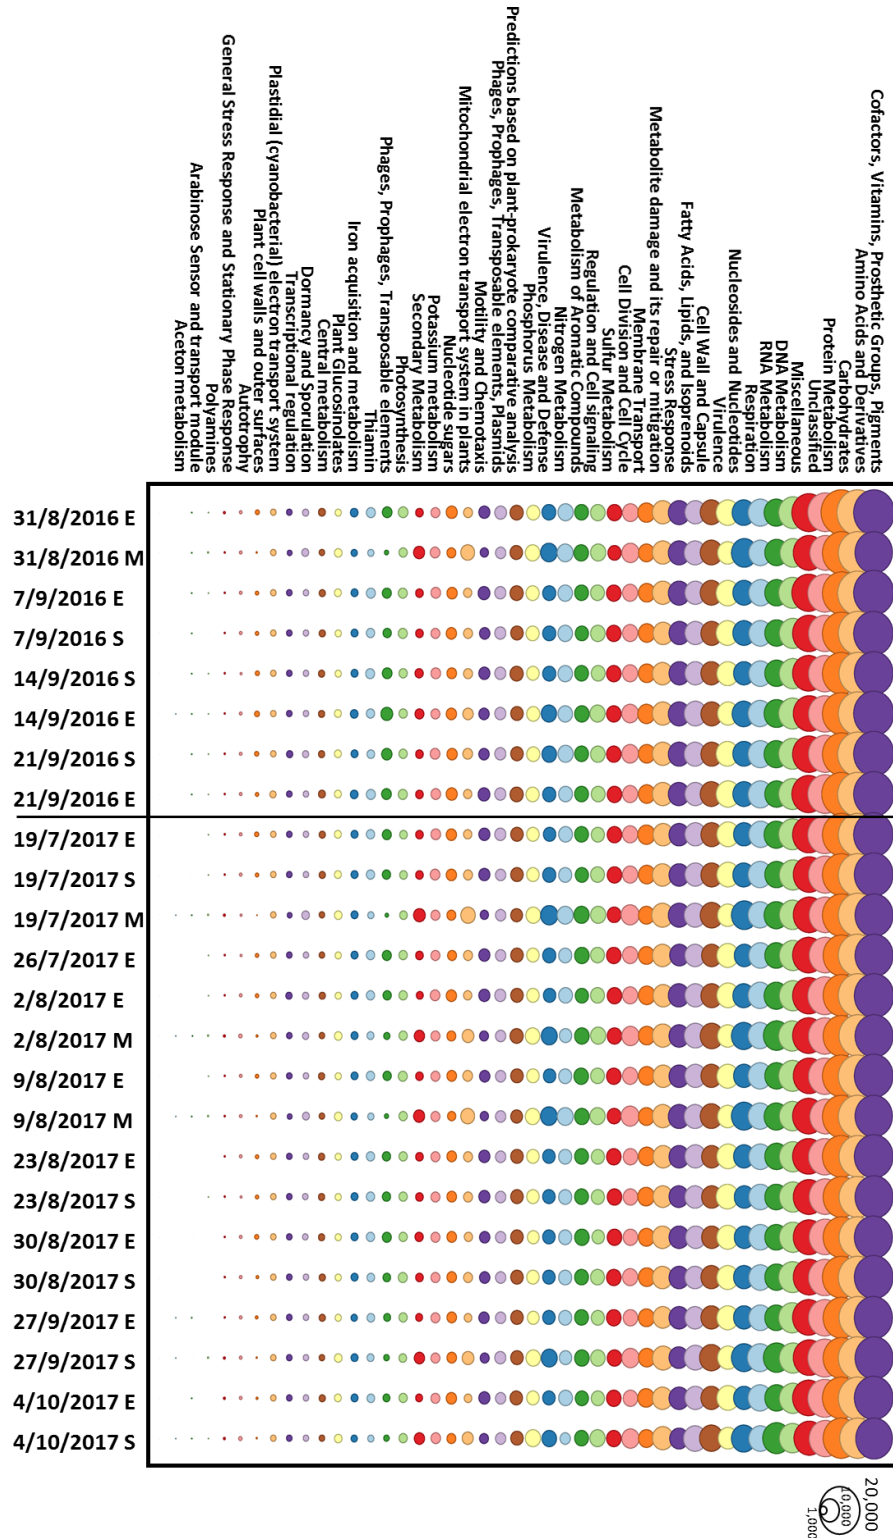

**Fig. S5.** Functional profile (SEED level 1) of the microbial community (shotgun samples). A representation of the SEED level 1 functional profiles as determined by MEGAN6 from DIAMOND blastx searches. Circles shown are proportional to the number of matches against the indicated SEED level 1 class. E stands for Epi, M for Meso and S for 2.5x Secchi

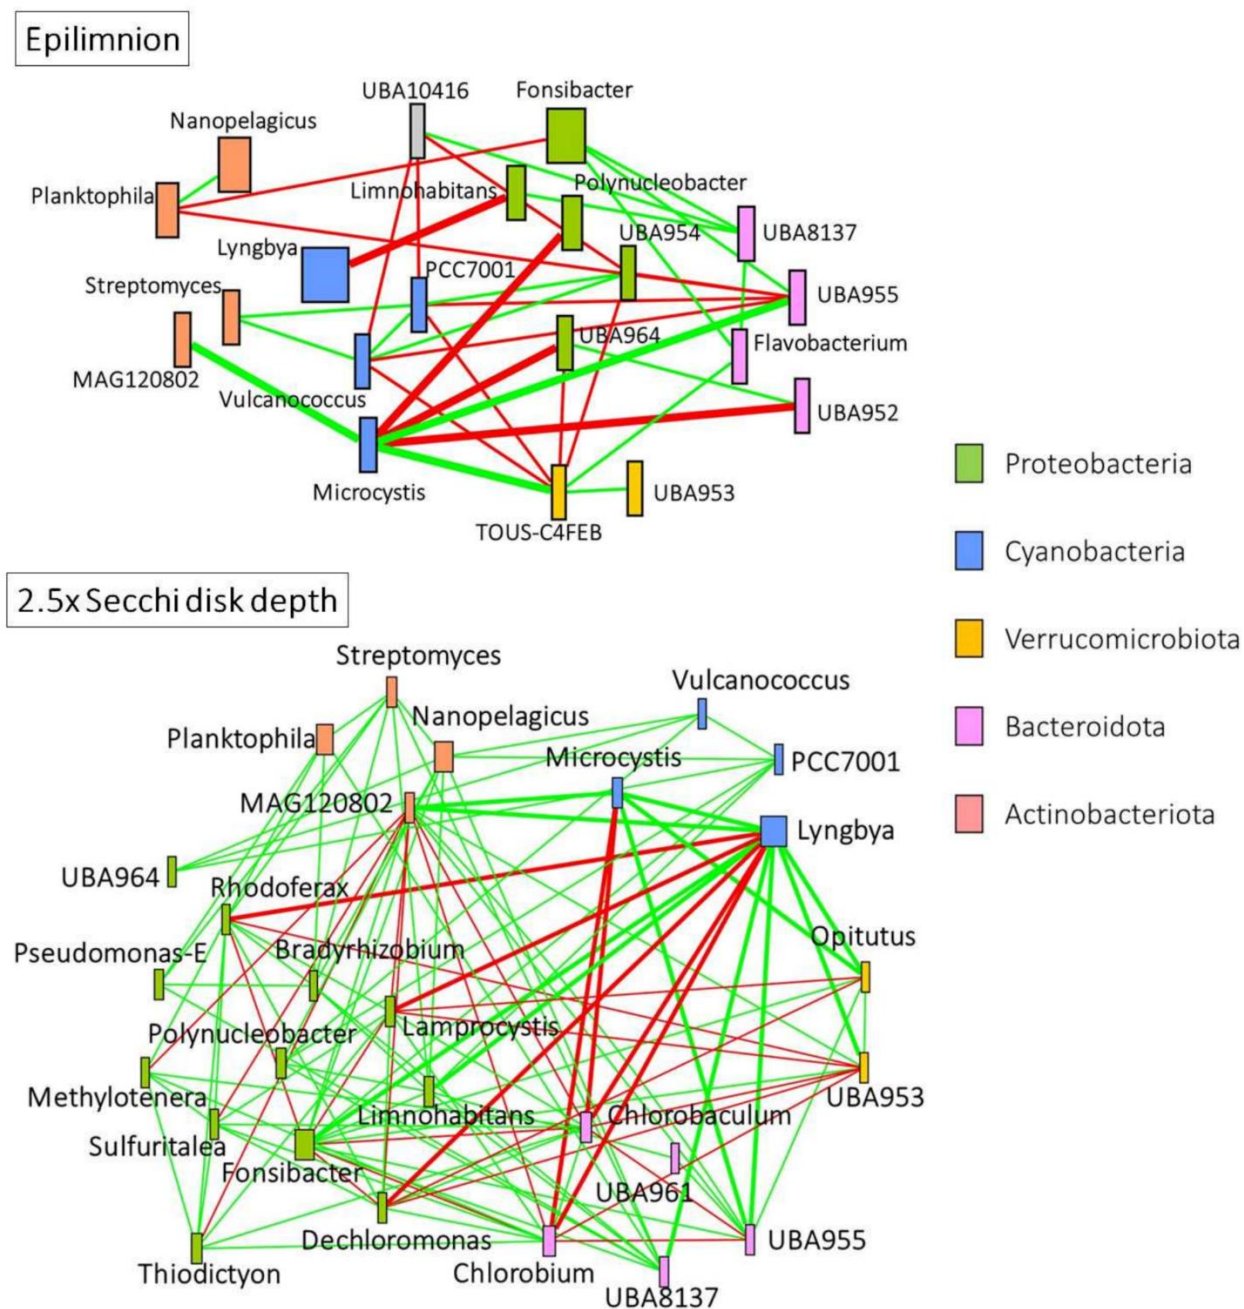

**Fig. S6.** Epilimnion and 2.5x Secchi depth co-occurrence network as calculated by Conet and Cytoscape based on the 2017 genus level Kraken2 results (genera with relative abundance  $\geq 1\%$ ). Connections involving *Lyngbya* or *Microcystis* are indicated by thicker lines. Green lines indicate positive interactions (co-occurrence) while red lines indicate negative interactions (mutual exclusion). Genera belonging to the same phylum are indicated by the color code on the right
